# Supplementary material for: Expanded scope for the iridium-catalyzed asymmetric isomerization of primary allylic alcohols using readily accessible second-generation catalysts
Source: Royal Society of Chemistry journal article supplement (doi:10.1039/b920342g), 2009-12-03

***Supporting Information for:***

**Expanded scope for the asymmetric isomerization of  
primary allylic alcohols using readily accessible second-  
generation catalysts**

**Luca Mantilli<sup>a</sup> and Clément Mazet\*<sup>a</sup>**

---

<sup>a</sup> *University of Geneva,  
Organic Chemistry Department,  
Quai Ernest Ansermet 30,  
1211-Geneva, Switzerland.*

*Fax: 41 (0) 22 3793215; Tel: 41 (0) 22 3796288;*

*E-mail: [clement.mazet@unige.ch](mailto:clement.mazet@unige.ch)*

---

**General Methods.** All reactions were carried out under an inert atmosphere of argon or nitrogen using either two-manifold vacuum / inert gas lines or a MBraun glove-box, unless otherwise noted. Solvents were dried over activated alumina columns and further degassed by three successive "freeze-pump-thaw" cycles if necessary. NMR spectra were recorded on ARX-300, AMX-400 and AMX-500 Bruker Avance spectrometers.  $^1\text{H}$  and  $^{13}\text{C}$  NMR chemical shifts are given in ppm relative to  $\text{SiMe}_4$ , with the solvent resonance used as internal reference.  $^{31}\text{P}$  NMR chemical shifts are reported in ppm relative to  $\text{H}_3\text{PO}_4$ . Infrared spectra were obtained on a Perkin-Elmer 1650 FT-IR spectrometer using neat samples on a diamond ATR Golden Gate sampler. Optical rotations were measured on a Perkin-Elmer 241 polarimeter equipped with a Na-lamp.

The mass spectrometric data were obtained at the mass spectrometry facility of the University of Geneva (<http://www.ms.unige.ch/sms>). Chiral GC analyses were performed on either a HP6890 or a HP6850 gas chromatograph. SFC analyses were run on a Berger SFC. Commercial reagents were purchased from Aldrich, Fluka, Acros or Strem and used without further purification, unless otherwise noted. Liquid reagents were transferred with stainless steel syringes or cannula. Flash chromatography was performed using silica gel 60 (230–400 mesh ASTM) from Fluka.

$\text{IrCl}_3 \cdot (\text{H}_2\text{O})_x$  was generously provided by Johnson-Matthey.  $[\text{Ir}(\text{COD})\text{Cl}]_2$ <sup>1</sup> was prepared according to literature procedures. New protected ligands **L-2a-f** and new precatalysts **2a-f** were fully characterized: data and  $^1\text{H}$ ,  $^{31}\text{P}\{^1\text{H}\}$ ,  $^{13}\text{C}\{^1\text{H}\}$  NMR ( $\text{CDCl}_3$ ) spectra are reported below;  $^1\text{H}$ ,  $^{31}\text{P}\{^1\text{H}\}$  NMR ( $\text{THF-d}_8$ ) are reported. Substrates **3b-f** and **3h-j** were synthesized using our protocol;<sup>2</sup> **3g** was synthesized using a procedure reported for a similar substrate.<sup>3</sup> Compounds **3b**,<sup>4b</sup> **3c**,<sup>2b,5</sup> **3d**,<sup>4b</sup> **3e**,<sup>2b,5,6</sup> **3f**,<sup>2</sup> **3g**,<sup>7</sup> **3h**,<sup>2a</sup> **3i**,<sup>2</sup> **3j**,<sup>5,8</sup> **3k**,<sup>9</sup> **4b**,<sup>2b,4b</sup> **4c**,<sup>2b,4a</sup> **4d**,<sup>2b,4b</sup> **4e**,<sup>2b,10</sup> **4f**,<sup>2b,4b</sup> **4g**,<sup>11</sup> **4h**,<sup>2</sup> **4i**,<sup>2,4</sup> **4j**,<sup>12</sup> **4k**<sup>13</sup> match the spectroscopic and spectrometric data reported in the literature.

**Representative procedure for the catalytic isomerization of allylic alcohols using (S)-2b.** (*R*)-4-methyl-3-phenylpentanal (**4a**, Table 1, entry 3): a 25 mL Schlenk containing 7.4 mg of catalyst (*S*)-**2b** (5.0 mol%) was purged by three successive vacuum/ $\text{N}_2$  sequences and refilled with  $\text{N}_2$ . Distilled THF (2 mL) was added next and  $\text{H}_2$  gas was gently bubbled directly through the solution via a stainless-steel needle at room temperature. The orange solution rapidly discolored. After 5 minutes, bubbling was ceased, the Schlenk was refilled with  $\text{N}_2$  and the rubber septum was replaced with a polyethylene stopper and the solution degassed by two successive freeze-pump-thaw

<sup>1</sup> J. Choudhury, S. Podder and S. Roy, *J. Am. Chem. Soc.*, 2005, **127**, 6162–6163.

<sup>2</sup> (a) L. Mantilli and C. Mazet, *Tetrahedron Lett.*, 2009, **50**, 4141–4144; (b) L. Mantilli, D. Gérard, S. Torche, C. Besnard and C. Mazet, *Angew. Chem. Int. Ed.*, 2009, **48**, 5143–5147.

<sup>3</sup> T. Nagano, J. Pospisil, G. Chollet, S. Shulthoff, V. Hickmann, E. Moulin, J. Herrmann, R. Müller and A. Fürstner, *Chem. Eur. J.*, 2009, **15**, 9697–9707.

<sup>4</sup> (a) K. Tanaka, S. Qiao, M. Tobisu, M. M.-C. Lo, G. C. Fu, *J. Am. Chem. Soc.*, 2000, **122**, 9870–9871; (b) K. Tanaka and G. C. Fu, *J. Org. Chem.*, 2001, **66**, 8177–8186.

<sup>5</sup> For a full characterization, see this work.

<sup>6</sup>  $R_f$ , m.p. and b.p. can be found in G. Pinna, G. Cignarella, G. Loriga, G. Morinreddu, J.-M. Mussinu, S. Ruiu, P. Fadda and W. Fratta, *Bioorg. Med. Chem.*, 1967, **32**, 1929–1937.

<sup>7</sup> H. Taguchi, K. Ghoroku, M. Tadaki, A. Tsubouchi and T. Takeda, *J. Org. Chem.*, 2002, **67**, 8450–8456.

<sup>8</sup> IR can be found in S. Bywater, P. Lachance and P. Black, *J. Organomet. Chem.*, 1985, **280**, 159–164; For a full characterization, see this work.

<sup>9</sup> Geraniol is commercially available from Aldrich.

<sup>10</sup> A. I. Meyers and M. Shipman, *J. Org. Chem.*, 1991, **56**, 7098–7102.

<sup>11</sup> T. K. Sarkar, S. K. Ghosh and T. K. Satapathi, *Tetrahedron*, 1990, **46**, 1885–1898.

<sup>12</sup> 3,5,5-trimethylhexanal is commercially available from Aldrich.

<sup>13</sup> Citronellal is commercially available from Aldrich.

cycles. After the second cycle, 17.5  $\mu\text{L}$  of (*E*)-3-phenylpent-2-en-1-ol (**3a**, 0.1 mmol) were added by micro-syringe and the reaction stirred at room temperature for 4h. Volatiles were removed under vacuum, the yellow residue was dissolved in  $\text{CDCl}_3$  and conversions were assessed by either  $^1\text{H}$  NMR spectroscopy or GC analysis using an internal standard. For purification, the residue was dissolved in cyclohexane/ethyl acetate (3:1) and filtered through a short plug of silica or Celite® (pasteur pipette) to remove the deactivated catalyst. The *ee* was determined by GC using a CP-Chirasil-Dex-CB chiral column. Yields match conversion in all cases.

## Comparative synthetic routes to ligands L-1 and L-2.

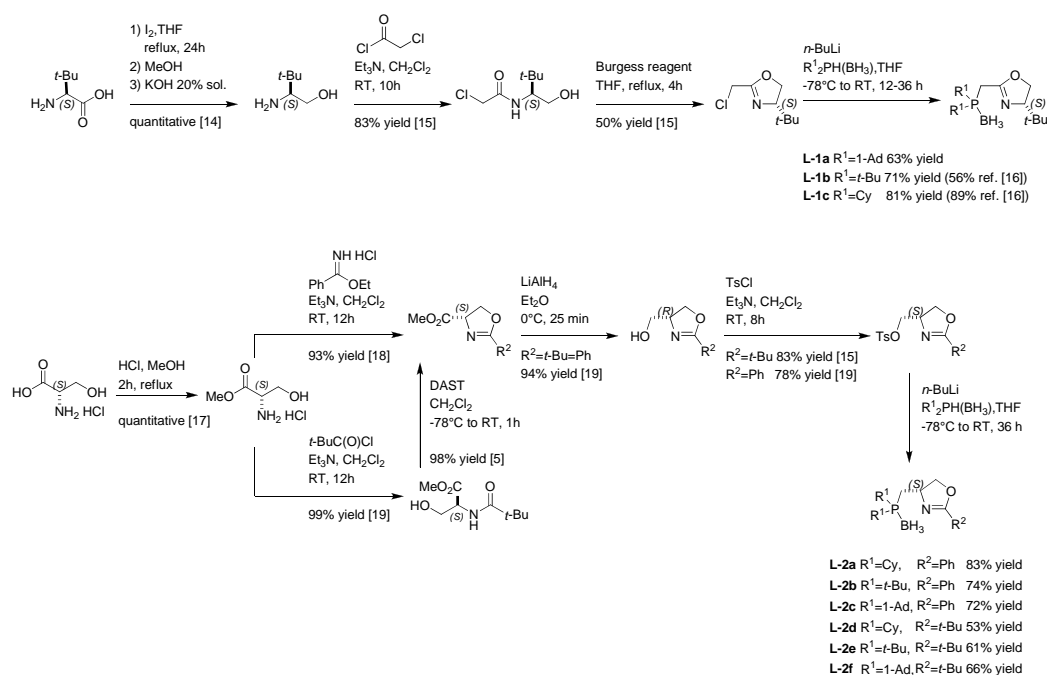

<sup>14</sup> M. Nakamura, T. Hatakeyama, K. Hara and E. Nakamura, *J. Am. Chem. Soc.*, 2003, **125**, 6362-6363.

<sup>15</sup> S. Nanchen and A. Pfaltz, *Chem. Eur. J.*, 2006, **12**, 4550-4558.

<sup>16</sup> M. G. Schrems, E. Neumann and A. Pfaltz, *Angew. Chem. Int. Ed.*, 2007, **46**, 8274-8276.

<sup>17</sup> F. Liu, J. Thomas and T. R. Burke Jr, *Synthesis*, 2008, **15**, 2432-2438.

<sup>18</sup> A. I. Meyers, W. Schmidt and M. J. McKennon, *Synthesis*, 1993, **2**, 250-262.

<sup>19</sup> M. Diéguez and O. Pàmies, *Chem. Eur. J.*, 2008, **14**, 3653-3669.

| Structure                                                                                                                                                                                                                                                                                                                                                                                                                                                                                                                                                                                                                                                                                                                  | <sup>1</sup> H                                                                                         | <sup>13</sup> C{ <sup>1</sup> H} | <sup>31</sup> P{ <sup>1</sup> H} | IR                                                                                                                                                                                                                                                                                                                                                                             | HRMS | [α] <sub>D</sub>                                                                       | MAZET GROUP DATA FORM                        |
|----------------------------------------------------------------------------------------------------------------------------------------------------------------------------------------------------------------------------------------------------------------------------------------------------------------------------------------------------------------------------------------------------------------------------------------------------------------------------------------------------------------------------------------------------------------------------------------------------------------------------------------------------------------------------------------------------------------------------|--------------------------------------------------------------------------------------------------------|----------------------------------|----------------------------------|--------------------------------------------------------------------------------------------------------------------------------------------------------------------------------------------------------------------------------------------------------------------------------------------------------------------------------------------------------------------------------|------|----------------------------------------------------------------------------------------|----------------------------------------------|
|                                                                                                                                                                                                                                                                                                                                                                                                                                                                                                                                                                                                                                                                                                                            | Name (S)-4-[(di-cyclohexylphosphoryl)-methyl]-2-(phenyl)-4,5-dihydrooxazoline-borane adduct.<br>LM-427 |                                  |                                  |                                                                                                                                                                                                                                                                                                                                                                                |      |                                                                                        | Formula C <sub>22</sub> H <sub>35</sub> BNOP |
| Properties white wax                                                                                                                                                                                                                                                                                                                                                                                                                                                                                                                                                                                                                                                                                                       |                                                                                                        |                                  |                                  |                                                                                                                                                                                                                                                                                                                                                                                |      |                                                                                        |                                              |
| Molecular Weight 371.30                                                                                                                                                                                                                                                                                                                                                                                                                                                                                                                                                                                                                                                                                                    | tlc conditions: SiO <sub>2</sub> , Pent / EtO <sub>2</sub> = 4:1<br>R <sub>f</sub> = 0.19 (UV)         |                                  |                                  |                                                                                                                                                                                                                                                                                                                                                                                |      | [α] <sub>D</sub> <sup>26</sup> = + 17.7<br>c 1.0, in CH <sub>2</sub> Cl <sub>2</sub> . |                                              |
|                                                                                                                                                                                                                                                                                                                                                                                                                                                                                                                                                                                                                                                                                                                            |                                                                                                        |                                  |                                  |                                                                                                                                                                                                                                                                                                                                                                                |      |                                                                                        |                                              |
| <sup>1</sup> H NMR (CDCl <sub>3</sub> , 500 MHz, 298 K) δ (ppm) = 7.92 (m, 2H, H <sub>ar</sub> ), 7.48 (m, 1H, H <sub>ar</sub> ), 7.40 (m, 2H, H <sub>ar</sub> ), 4.60 (ap.t, <sup>3</sup> J <sub>HH</sub> = 9.0 Hz, 1H, CHO), 4.53 (m, 1H, CHN), 4.15 (dd, <sup>2</sup> J <sub>HH</sub> = 9.0 Hz, <sup>3</sup> J <sub>HH</sub> = 7.3 Hz, 1H, CHO), 2.23 (ap.t, <sup>2</sup> J <sub>HP</sub> = <sup>2</sup> J <sub>HH</sub> = 14.5 Hz, <sup>3</sup> J <sub>HH</sub> = 3.8 Hz, 1H, CHP), 1.93-1.69 (m, 1H, CHP, 12H, H <sub>Cy</sub> ), 1.48-1.44 (m, 2H, H <sub>Cy</sub> ), 1.28-1.22 (m, 8H, H <sub>Cy</sub> ), 0.33 (bq, <sup>1</sup> J <sub>HB</sub> = 107.8 Hz, 3H, BH <sub>3</sub> ).                                 |                                                                                                        |                                  |                                  |                                                                                                                                                                                                                                                                                                                                                                                |      |                                                                                        |                                              |
| <sup>13</sup> C NMR (CDCl <sub>3</sub> , 126 MHz, 298 K) δ (ppm) = 164.3 (s, CN), 131.6 (s, C <sub>ar</sub> ), 128.5 (s, C <sub>ar</sub> ), 128.4 (s, C <sub>ar</sub> ), 127.6 (s, C <sub>ipso</sub> ), 74.4 (d, <sup>3</sup> J <sub>CP</sub> = 2.8 Hz, CH <sub>2</sub> O), 63.3 (d, <sup>2</sup> J <sub>CP</sub> = 2.8 Hz, CHN), 32.9 (d, <sup>1</sup> J <sub>CP</sub> = 32.1 Hz, CH <sub>2</sub> O), 31.8 (d, <sup>1</sup> J <sub>CP</sub> = 33.0 Hz, CH <sub>2</sub> O), 27.1-26.8 (m, CH <sub>2</sub> O), 26.6 (d, <sup>1</sup> J <sub>CP</sub> = 32.1 Hz, CH <sub>2</sub> P), 26.5 (d, <sup>4</sup> J <sub>CP</sub> = 2.8 Hz, CH <sub>2</sub> O), 26.0 (d, <sup>4</sup> J <sub>CP</sub> = 3.7 Hz, CH <sub>2</sub> O). |                                                                                                        |                                  |                                  |                                                                                                                                                                                                                                                                                                                                                                                |      |                                                                                        |                                              |
| <sup>31</sup> P{ <sup>1</sup> H} NMR (CDCl <sub>3</sub> , 202 MHz, 298 K) δ (ppm) = 21.5 (m).                                                                                                                                                                                                                                                                                                                                                                                                                                                                                                                                                                                                                              |                                                                                                        |                                  |                                  | IR spectrum (neat) ν (cm <sup>-1</sup> ) = 22923, 2852, 2369, 2352, 2269, 1652, 1579, 1492, 1471, 1449, 1361, 1301, 1264, 1208, 1174, 1135, 1078, 1065, 1016, 963, 933, 905, 851, 777, 694, 678.                                                                                                                                                                               |      |                                                                                        |                                              |
| HRMS (method: ESI+)                                                                                                                                                                                                                                                                                                                                                                                                                                                                                                                                                                                                                                                                                                        |                                                                                                        |                                  |                                  | relevant literature references: S. Nanchen, A. Pfaltz <i>Chem. Eur. J.</i> <b>2006</b> , <i>12</i> , 4550-4558; M. Diéguez, O. Pàmies <i>Chem. Eur. J.</i> <b>2008</b> , <i>14</i> , 3653-3669; D.-R. Hou, K. Burgess, <i>Org. Lett.</i> <b>1999</b> , <i>1</i> , 1745-1747; D.-R. Hou, J. H. Reibenspies, K. Burgess, <i>J. Org. Chem.</i> <b>2001</b> , <i>66</i> , 206-215. |      |                                                                                        |                                              |
| calculated for C <sub>22</sub> H <sub>36</sub> BNP [M+H] <sup>+</sup> : 372.2622,<br>found 372.2601.                                                                                                                                                                                                                                                                                                                                                                                                                                                                                                                                                                                                                       |                                                                                                        |                                  |                                  |                                                                                                                                                                                                                                                                                                                                                                                |      |                                                                                        |                                              |
| Separation Conditions                                                                                                                                                                                                                                                                                                                                                                                                                                                                                                                                                                                                                                                                                                      |                                                                                                        |                                  |                                  |                                                                                                                                                                                                                                                                                                                                                                                |      |                                                                                        |                                              |
| HPLC (column, λ <sub>1</sub> , λ <sub>2</sub> , eluent, flow rate, retention time):                                                                                                                                                                                                                                                                                                                                                                                                                                                                                                                                                                                                                                        |                                                                                                        |                                  |                                  | GC (column, method or sequence, retention time):                                                                                                                                                                                                                                                                                                                               |      |                                                                                        |                                              |

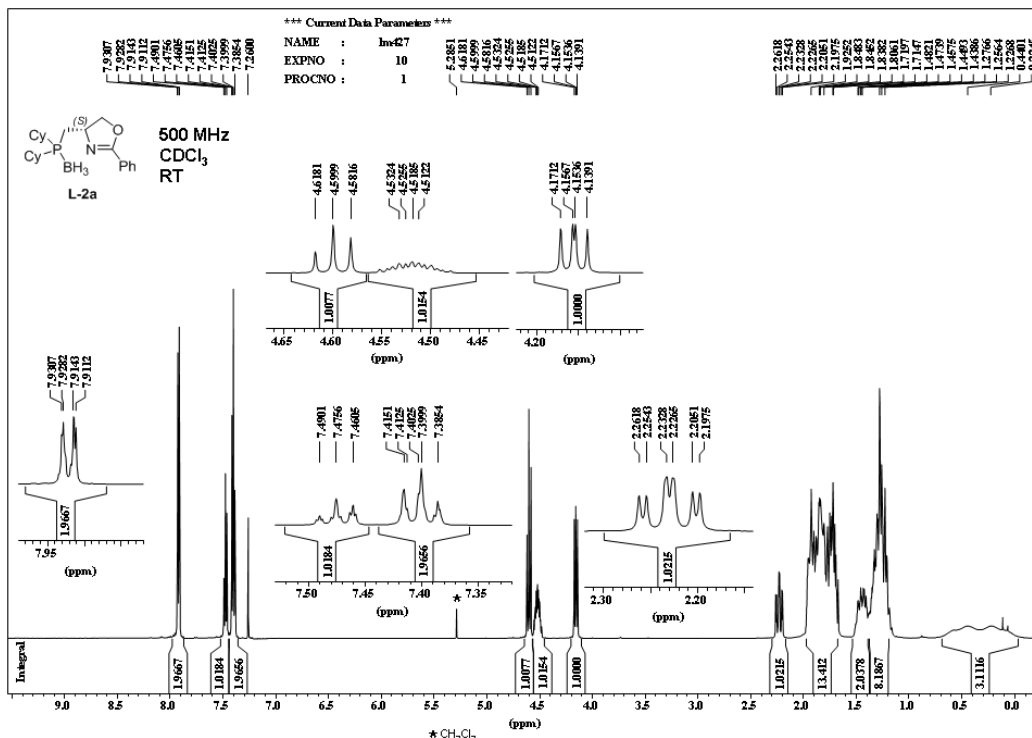

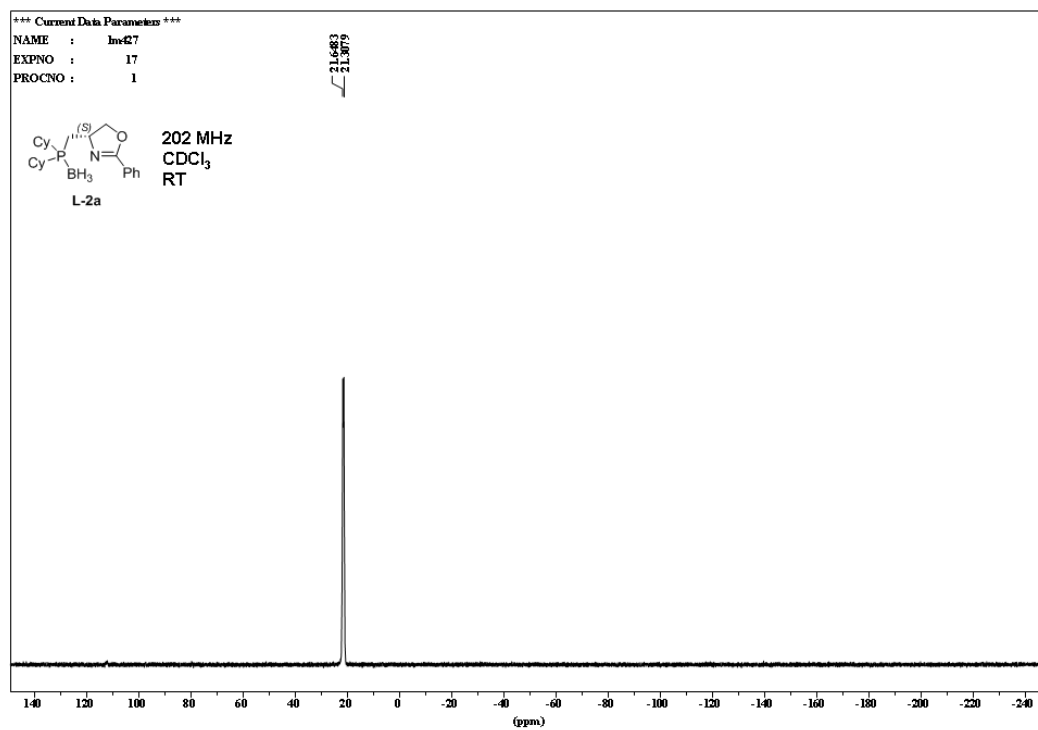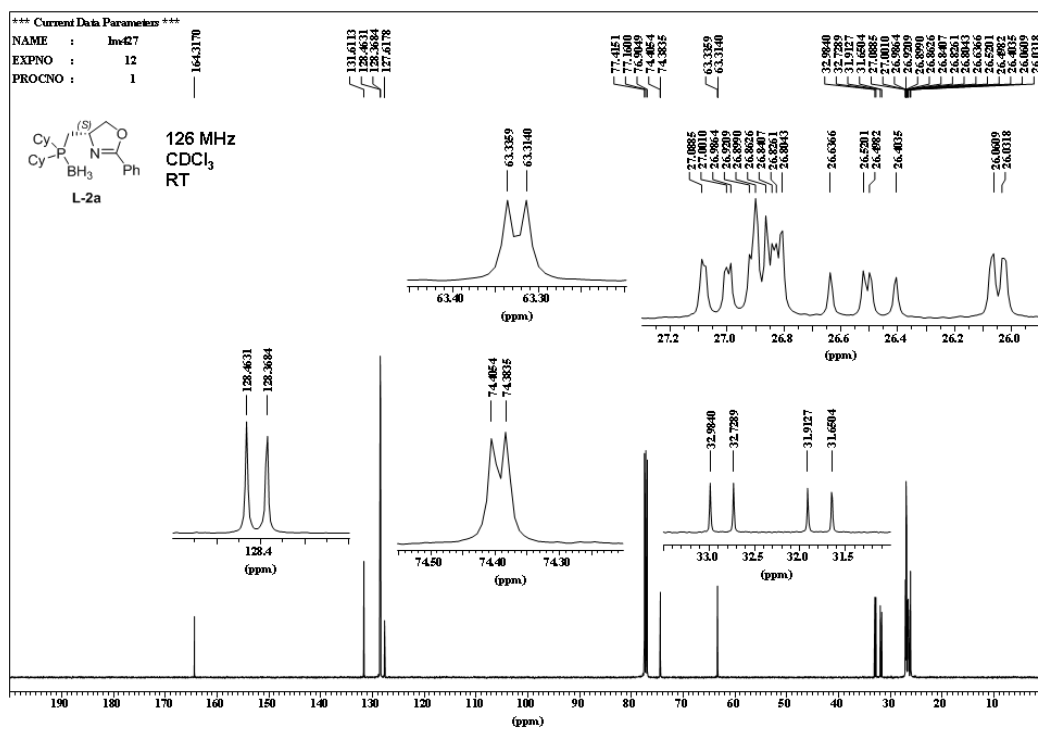



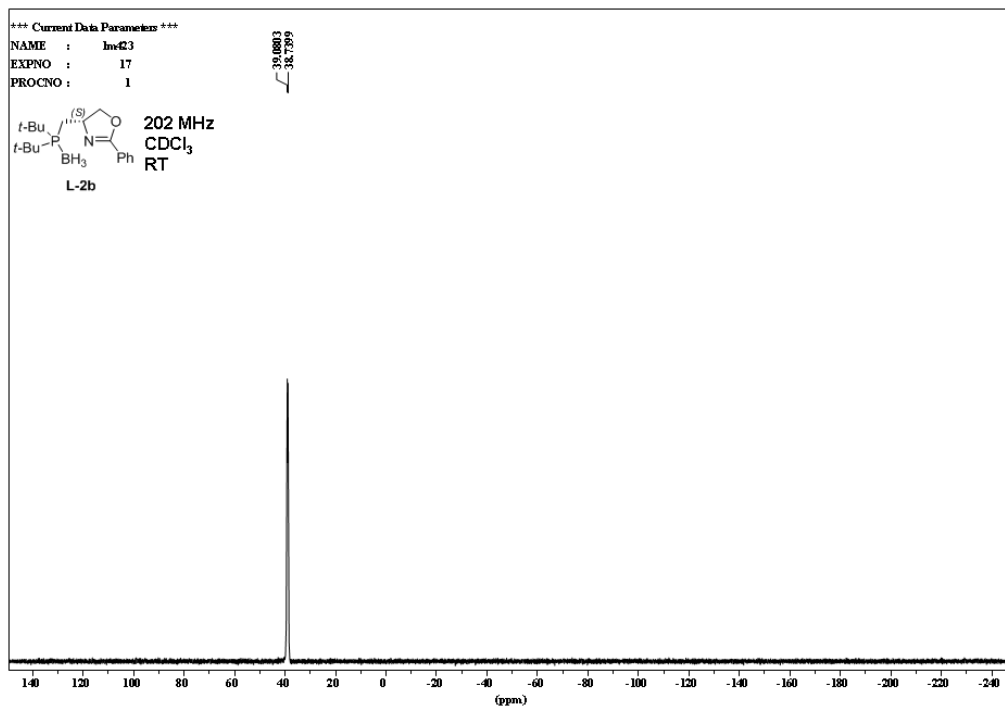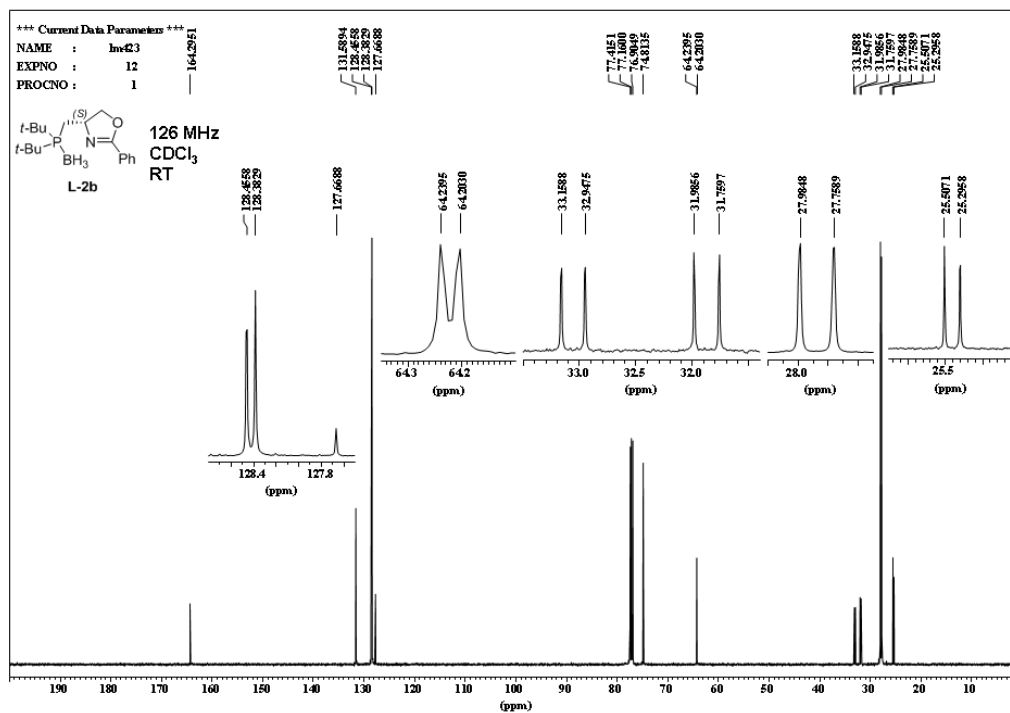

| Structure                                                                                                                                                                                                                                                                                                                                                                                                                                                                                                                                                                                                                                                                                                                                                                                        | $^1\text{H}$                                                                                                   | $^{13}\text{C}\{^1\text{H}\}$ | $^{31}\text{P}\{^1\text{H}\}$ | IR                                                                                                                                                                                                                                                                                                                                                                                    | HRMS | $[\alpha]_D$                                                              | MAZET GROUP DATA FORM |
|--------------------------------------------------------------------------------------------------------------------------------------------------------------------------------------------------------------------------------------------------------------------------------------------------------------------------------------------------------------------------------------------------------------------------------------------------------------------------------------------------------------------------------------------------------------------------------------------------------------------------------------------------------------------------------------------------------------------------------------------------------------------------------------------------|----------------------------------------------------------------------------------------------------------------|-------------------------------|-------------------------------|---------------------------------------------------------------------------------------------------------------------------------------------------------------------------------------------------------------------------------------------------------------------------------------------------------------------------------------------------------------------------------------|------|---------------------------------------------------------------------------|-----------------------|
| 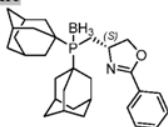                                                                                                                                                                                                                                                                                                                                                                                                                                                                                                                                                                                                                                                                                                                | <b>Name</b> (S)-4-[(di-1-adamantylphosphoryl)-methyl]-2-(phenyl)-4,5-dihydrooxazoline-borane adduct.<br>LM-425 |                               |                               |                                                                                                                                                                                                                                                                                                                                                                                       |      |                                                                           |                       |
|                                                                                                                                                                                                                                                                                                                                                                                                                                                                                                                                                                                                                                                                                                                                                                                                  | <b>Properties</b> white powder                                                                                 |                               |                               |                                                                                                                                                                                                                                                                                                                                                                                       |      | <b>Formula</b> C <sub>30</sub> H <sub>43</sub> BNOP                       |                       |
| <b>Molecular Weight</b> 475.45                                                                                                                                                                                                                                                                                                                                                                                                                                                                                                                                                                                                                                                                                                                                                                   | tlc conditions: SiO <sub>2</sub> , Pent / EtO <sub>2</sub> = 3:1<br>$R_f$ = 0.28 (UV)                          |                               |                               |                                                                                                                                                                                                                                                                                                                                                                                       |      | $[\alpha]_D^{26} = +1.6$<br>$c$ 1.0. in CH <sub>2</sub> Cl <sub>2</sub> . | $M_p$ = 223-224 °C    |
| <b><math>^1\text{H}</math> NMR (CDCl<sub>3</sub>, 400 MHz, 298 K)</b> $\delta$ (ppm) = 7.95 (d, $^3J_{\text{HH}}$ = 7.3 Hz, 2H, H <sub>arPh</sub> ), 7.48 (t, $^3J_{\text{HH}}$ = 7.3 Hz, 1H, H <sub>arPh</sub> ), 7.41 (t, $^3J_{\text{HH}}$ = 7.3 Hz, 2H, H <sub>arPh</sub> ), 4.64 (ap.t, $^{2,3}J_{\text{HH}}$ = 8.7 Hz, 1H, CHO), 4.50 (m, 1H, CHN), 4.20 (ap.t, $^{2,3}J_{\text{HH}}$ = 8.7 Hz, 1H, CHO), 2.38 (ap.t, $^2J_{\text{HP}}$ = $^2J_{\text{HH}}$ = 14.4 Hz, 1H, CHP), 2.11 (m, 6H, CH <sub>2</sub> C <sub>Ad</sub> ), 2.03 (m, 6H, CH <sub>2</sub> C <sub>Ad</sub> ), 1.76 (m, 12H, CH <sub>2</sub> CH <sub>Ad</sub> ), 1.63 (m, 1H, CH <sub>2</sub> P), 0.29 (bq, $^1J_{\text{HB}}$ = 109.4 Hz, 3H, BH <sub>3</sub> ).                                                         |                                                                                                                |                               |                               |                                                                                                                                                                                                                                                                                                                                                                                       |      |                                                                           |                       |
| <b><math>^{13}\text{C}</math> NMR (CDCl<sub>3</sub>, 126 MHz, 298 K)</b> $\delta$ (ppm) = 164.3 (s, CN), 131.6 (s, C <sub>arPh</sub> ), 128.5 (s, C <sub>arPh</sub> ), 128.4 (s, C <sub>arPh</sub> ), 127.8 (s, C <sub>arPh</sub> ), 75.0 (s, CH <sub>2</sub> O), 64.3 (d, $^2J_{\text{CP}}$ = 2.9 Hz, CHN), 38.0 (s, CH <sub>2</sub> C <sub>Ad</sub> ), 37.8 (s, CH <sub>2</sub> C <sub>Ad</sub> ), 37.6 (d, $^1J_{\text{CP}}$ = 24.8 Hz, C <sub>AdP</sub> ), 36.6 (s, CH <sub>2</sub> CH <sub>Ad</sub> ), 36.5 (s, CH <sub>2</sub> CH <sub>Ad</sub> ), 36.3 (d, $^1J_{\text{CP}}$ = 26.6 Hz, C <sub>AdP</sub> ), 28.2 (d, $^2J_{\text{CP}}$ = 1.8 Hz, CHC <sub>Ad</sub> ), 28.1 (d, $^2J_{\text{CP}}$ = 1.8 Hz, CHC <sub>Ad</sub> ), 22.3 (d, $^1J_{\text{CP}}$ = 26.6 Hz, CH <sub>2</sub> P). |                                                                                                                |                               |                               |                                                                                                                                                                                                                                                                                                                                                                                       |      |                                                                           |                       |
| <b><math>^{31}\text{P}\{^1\text{H}\}</math> NMR (CDCl<sub>3</sub>, 162 MHz, 298 K)</b> $\delta$ (ppm) = 29.1 (m).                                                                                                                                                                                                                                                                                                                                                                                                                                                                                                                                                                                                                                                                                |                                                                                                                |                               |                               | <b>IR spectrum (neat)</b> $\nu$ (cm <sup>-1</sup> ) = 2961, 2932, 2904, 2849, 2402, 2368, 2266, 1649, 1579, 1496, 1470, 1448, 1356, 1345, 1304, 1255, 1174, 1069, 1061, 1028, 958, 910, 837, 795, 772, 733, 691, 671, 646.                                                                                                                                                            |      |                                                                           |                       |
| <b>HRMS (method: ESI+)</b><br>calculated for C <sub>30</sub> H <sub>44</sub> BNOP [M+H] <sup>+</sup> : 476.3248,<br>found 476.3281.                                                                                                                                                                                                                                                                                                                                                                                                                                                                                                                                                                                                                                                              |                                                                                                                |                               |                               | <b>relevant literature references:</b> S. Nanchen, A. Pfaltz <i>Chem. Eur. J.</i> <b>2006</b> , <i>12</i> , 4550-4558; M. Diéguez, O. Pàmies <i>Chem. Eur. J.</i> <b>2008</b> , <i>14</i> , 3653-3669; D.-R. Hou, K. Burgess, <i>Org. Lett.</i> <b>1999</b> , <i>1</i> , 1745-1747; D.-R. Hou, J. H. Reibenspies, K. Burgess, <i>J. Org. Chem.</i> <b>2001</b> , <i>66</i> , 206-215. |      |                                                                           |                       |
| Separation Conditions                                                                                                                                                                                                                                                                                                                                                                                                                                                                                                                                                                                                                                                                                                                                                                            |                                                                                                                |                               |                               |                                                                                                                                                                                                                                                                                                                                                                                       |      |                                                                           |                       |
| <b>HPLC (column, <math>\lambda_1</math>, <math>\lambda_2</math>, eluent, flow rate, retention time):</b>                                                                                                                                                                                                                                                                                                                                                                                                                                                                                                                                                                                                                                                                                         |                                                                                                                |                               |                               | <b>GC (column, method or sequence, retention time):</b>                                                                                                                                                                                                                                                                                                                               |      |                                                                           |                       |

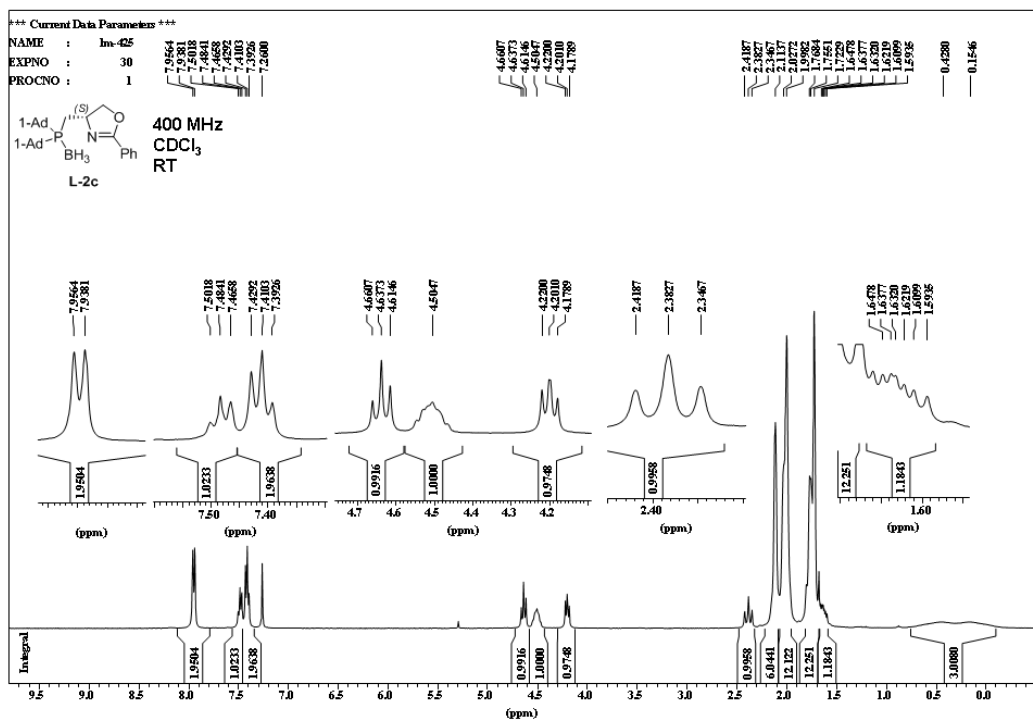



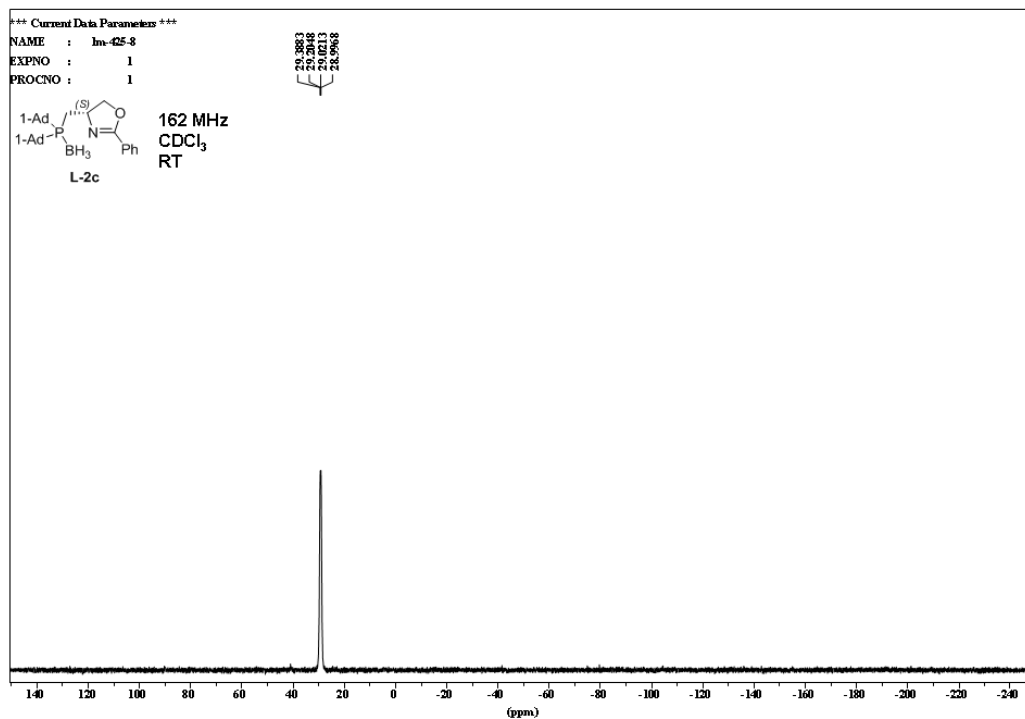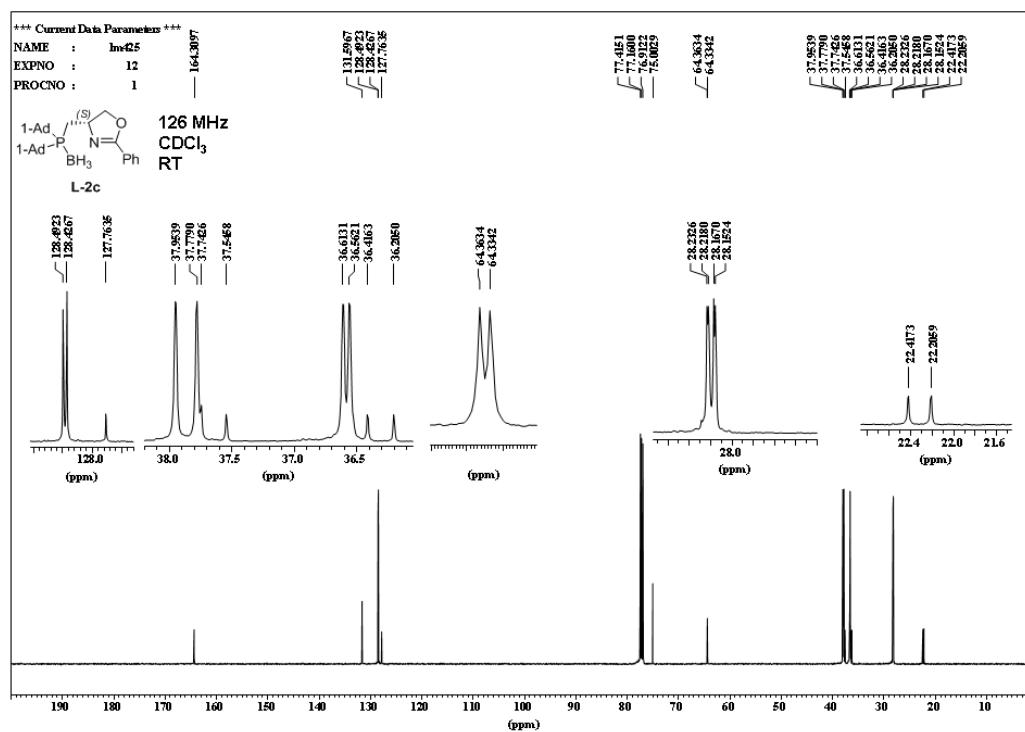

| Structure                                                                                                                                                                                                                                                                                                                                                                                                                                                                                                                                                                                                                                                                                                                        | <sup>1</sup> H                                                                                                 | <sup>13</sup> C{ <sup>1</sup> H} | <sup>31</sup> P{ <sup>1</sup> H} | IR                                                                                                                                                                                                                                                                                                                                                                           | HRMS | [α] <sub>D</sub>                                                                       | MAZET GROUP DATA FORM |
|----------------------------------------------------------------------------------------------------------------------------------------------------------------------------------------------------------------------------------------------------------------------------------------------------------------------------------------------------------------------------------------------------------------------------------------------------------------------------------------------------------------------------------------------------------------------------------------------------------------------------------------------------------------------------------------------------------------------------------|----------------------------------------------------------------------------------------------------------------|----------------------------------|----------------------------------|------------------------------------------------------------------------------------------------------------------------------------------------------------------------------------------------------------------------------------------------------------------------------------------------------------------------------------------------------------------------------|------|----------------------------------------------------------------------------------------|-----------------------|
|                                                                                                                                                                                                                                                                                                                                                                                                                                                                                                                                                                                                                                                                                                                                  | Name (S)-4-[(di-cyclohexylphosphanyl)-methyl]-2-(tert-butyl)-4,5-dihydrooxazoline-borane adduct.<br>LM-519     |                                  |                                  |                                                                                                                                                                                                                                                                                                                                                                              |      |                                                                                        |                       |
|                                                                                                                                                                                                                                                                                                                                                                                                                                                                                                                                                                                                                                                                                                                                  | Properties white wax                                                                                           |                                  |                                  |                                                                                                                                                                                                                                                                                                                                                                              |      | Formula C <sub>20</sub> H <sub>39</sub> BNOP                                           |                       |
| Molecular Weight 351.31                                                                                                                                                                                                                                                                                                                                                                                                                                                                                                                                                                                                                                                                                                          | tlc conditions: SiO <sub>2</sub> , Pent / EtO <sub>2</sub> = 6:1<br>R <sub>f</sub> = 0.31 (KMnO <sub>4</sub> ) |                                  |                                  |                                                                                                                                                                                                                                                                                                                                                                              |      | [α] <sub>D</sub> <sup>26</sup> = + 30.9<br>c 1.0, in CH <sub>2</sub> Cl <sub>2</sub> . |                       |
| <sup>1</sup> H NMR (CDCl <sub>3</sub> , 400 MHz, 298 K) δ (ppm) = 4.36 (ap.t, <sup>2,3</sup> J <sub>BH</sub> = 9.1 Hz, 1H, CHO), 4.24 (m, 1H, CHN), 3.89 (dd, <sup>2</sup> J <sub>BH</sub> = 9.1 Hz, <sup>3</sup> J <sub>BH</sub> = 7.3 Hz, 1H, CHO), 2.10 (ap.td, <sup>2</sup> J <sub>BH</sub> = <sup>2</sup> J <sub>BH</sub> = 14.3 Hz, <sup>3</sup> J <sub>BH</sub> = 3.8 Hz, 1H, CHP), 1.91-1.65 (m, 12H, H <sub>cy</sub> ), 1.52 (ddd, <sup>2</sup> J <sub>BH</sub> = 14.6 Hz, <sup>2</sup> J <sub>BH</sub> = 9.8 Hz, <sup>3</sup> J <sub>BH</sub> = 7.3 Hz, 1H, CHP), 1.42-1.22 (m, 10H, H <sub>cy</sub> ), 1.17 (s, 9H, CH <sub>3</sub> Bu ox), 0.24 (bq, <sup>1</sup> J <sub>BH</sub> = 112.4 Hz, 3H, BH <sub>3</sub> ). |                                                                                                                |                                  |                                  |                                                                                                                                                                                                                                                                                                                                                                              |      |                                                                                        |                       |
| <sup>13</sup> C NMR (CDCl <sub>3</sub> , 101 MHz, 298 K) δ (ppm) = 174.7 (s, CN), 74.2 (d, <sup>3</sup> J <sub>CP</sub> = 1.8 Hz, CH <sub>2</sub> O), 62.8 (d, <sup>2</sup> J <sub>CP</sub> = 2.8 Hz, CHN), 33.3 (s, C <sub>Bu</sub> ox), 32.8 (d, <sup>1</sup> J <sub>CP</sub> = 32.3 Hz, CH <sub>cy</sub> ), 31.7 (d, <sup>1</sup> J <sub>CP</sub> = 34.1 Hz, CH <sub>cy</sub> ), 28.0 (s, CH <sub>3</sub> Bu ox), 27.1-26.5 (m, CH <sub>2</sub> cy), 26.6 (d, <sup>1</sup> J <sub>CP</sub> = 26.7 Hz, CH <sub>2</sub> P), 26.0 (s, CH <sub>2</sub> cy).                                                                                                                                                                       |                                                                                                                |                                  |                                  |                                                                                                                                                                                                                                                                                                                                                                              |      |                                                                                        |                       |
| <sup>31</sup> P{ <sup>1</sup> H} NMR (CDCl <sub>3</sub> , 162 MHz, 298 K) δ (ppm) = 21.2 (m).                                                                                                                                                                                                                                                                                                                                                                                                                                                                                                                                                                                                                                    |                                                                                                                |                                  |                                  | IR spectrum (neat) ν (cm <sup>-1</sup> ) = 2928, 2853, 2369, 2380, 2263, 1654, 1480, 1449, 1394, 1362, 1344, 1302, 1271, 1211, 1173, 1140, 1064, 1004, 977, 924, 890, 854, 826, 781, 732.                                                                                                                                                                                    |      |                                                                                        |                       |
| HRMS (method: ESI+) calculated for C <sub>20</sub> H <sub>38</sub> BNP [M-H]: 350.2778, found 350.2792.                                                                                                                                                                                                                                                                                                                                                                                                                                                                                                                                                                                                                          |                                                                                                                |                                  |                                  | relevant literature references: S. Nanchen, A. Pfaltz <i>Chem. Eur. J.</i> <b>2006</b> , <i>12</i> , 4550-4558; M. Diéguez, O. Pàmies <i>Chem. Eur. J.</i> <b>2008</b> , <i>14</i> , 3653-3669; D.-R. Hou, K. Burgess <i>Org. Lett.</i> <b>1999</b> , <i>1</i> , 1745-1747; D.-R. Hou, J. H. Reibenspies, K. Burgess <i>J. Org. Chem.</i> <b>2001</b> , <i>66</i> , 206-215. |      |                                                                                        |                       |
| Separation Conditions                                                                                                                                                                                                                                                                                                                                                                                                                                                                                                                                                                                                                                                                                                            |                                                                                                                |                                  |                                  |                                                                                                                                                                                                                                                                                                                                                                              |      |                                                                                        |                       |
| HPLC (column, λ <sub>1</sub> , λ <sub>2</sub> , eluent, flow rate, retention time):                                                                                                                                                                                                                                                                                                                                                                                                                                                                                                                                                                                                                                              |                                                                                                                |                                  |                                  | GC (column, method or sequence, retention time):                                                                                                                                                                                                                                                                                                                             |      |                                                                                        |                       |

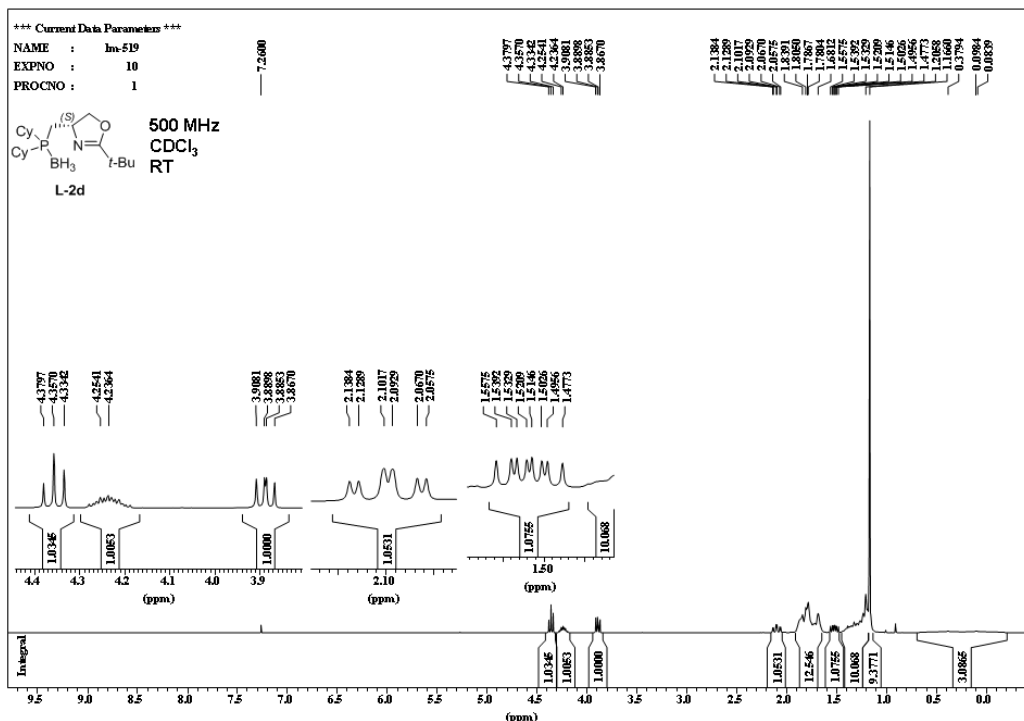





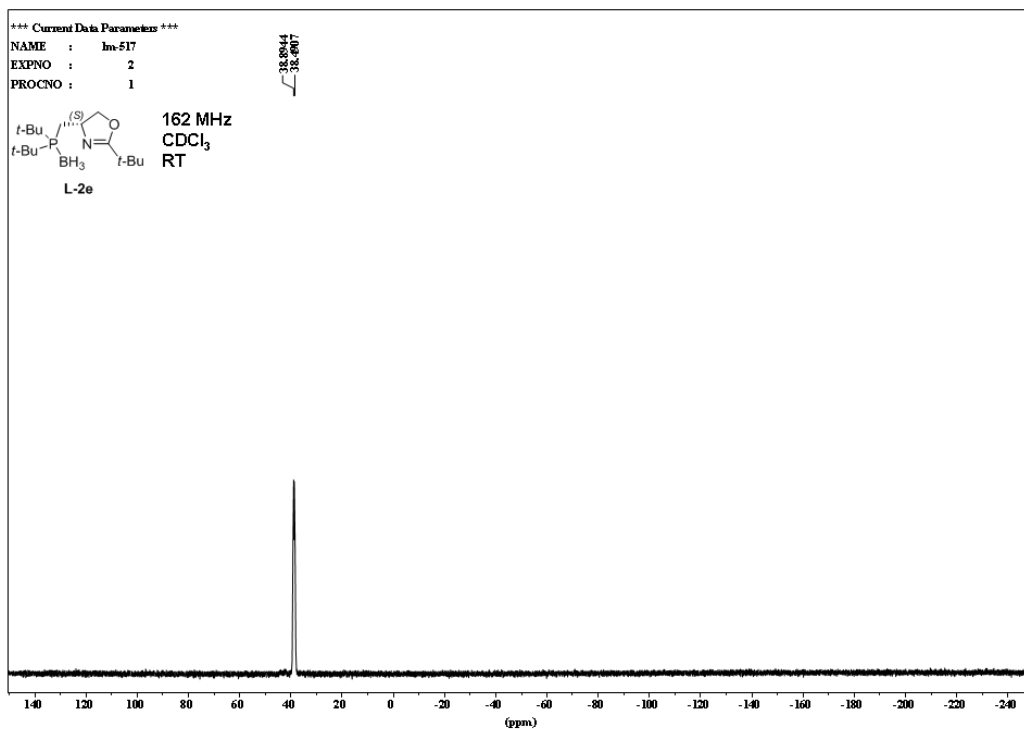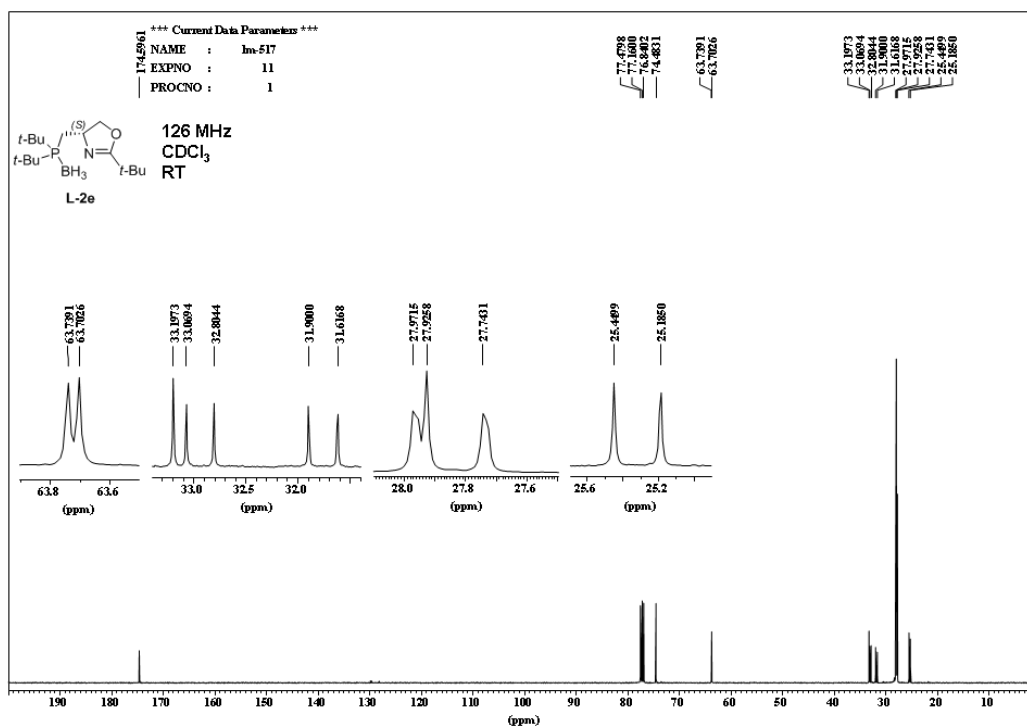

| Structure                                                                                                                                                                                                                                                                                                                                                                                                                                                                                                                                                                                                                                                                                                                | $^1\text{H}$                                                                                             | $^{13}\text{C}\{^1\text{H}\}$ | $^{31}\text{P}\{^1\text{H}\}$ | IR                                                                                                                                                                                                                                                                                                                                                                           | HRMS                                                               | $[\alpha]_D$ | MAZET GROUP DATA FORM                           |
|--------------------------------------------------------------------------------------------------------------------------------------------------------------------------------------------------------------------------------------------------------------------------------------------------------------------------------------------------------------------------------------------------------------------------------------------------------------------------------------------------------------------------------------------------------------------------------------------------------------------------------------------------------------------------------------------------------------------------|----------------------------------------------------------------------------------------------------------|-------------------------------|-------------------------------|------------------------------------------------------------------------------------------------------------------------------------------------------------------------------------------------------------------------------------------------------------------------------------------------------------------------------------------------------------------------------|--------------------------------------------------------------------|--------------|-------------------------------------------------|
| 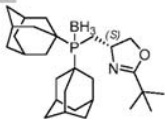                                                                                                                                                                                                                                                                                                                                                                                                                                                                                                                                                                                                                                        | Name (S)-4-[(di-1-adamantylphosphanyl)-methyl]-2-(tert-butyl)-4,5-dihydrooxazoline-borane adduct. LM-521 |                               |                               |                                                                                                                                                                                                                                                                                                                                                                              |                                                                    |              | Formula $\text{C}_{28}\text{H}_{47}\text{BNOP}$ |
|                                                                                                                                                                                                                                                                                                                                                                                                                                                                                                                                                                                                                                                                                                                          | Properties white solid                                                                                   |                               |                               |                                                                                                                                                                                                                                                                                                                                                                              |                                                                    |              |                                                 |
| Molecular Weight 455.46                                                                                                                                                                                                                                                                                                                                                                                                                                                                                                                                                                                                                                                                                                  | tlc conditions: $\text{SiO}_2$ , Pent / $\text{EtO}_2$ = 8:1<br>$R_f$ = 0.22 ( $\text{KMnO}_4$ )         |                               |                               |                                                                                                                                                                                                                                                                                                                                                                              | $[\alpha]_D^{26} = +6.6$<br>$c$ 1.0. in $\text{CH}_2\text{Cl}_2$ . |              | $Mp$ = 200 °C                                   |
| $^1\text{H}$ NMR ( $\text{CDCl}_3$ , 400 MHz, 298 K) $\delta$ (ppm) = 4.42 (ap.t., $^{2,3}J_{\text{HH}} = 4.42$ (ap.t., $^{2,3}J_{\text{HH}} = 9.1$ Hz, 1H, $\text{CHO}$ ), 4.23 (m, 1H, $\text{CHN}$ ), 3.91 (dd, $^2J_{\text{HH}} = 9.1$ Hz, $^3J_{\text{HH}} = 7.8$ Hz, 1H, $\text{CHO}$ ), 2.28 (ap.t., $^2J_{\text{HP}} = ^2J_{\text{HH}} = 14.4$ Hz, 1H, $\text{CHP}$ ), 2.05 (m, 6H, $\text{CH}_2\text{C}_{\text{Ad}}$ ), 1.97 (m, 6H, $\text{CH}_2\text{C}_{\text{Ad}}$ ), 1.76 (m, 12H, $\text{CH}_2\text{CH}_{\text{Ad}}$ ), 1.44 (ddd, $^2J_{\text{HP}} = 15.1$ Hz, $^2J_{\text{HH}} = 11.4$ Hz, $^3J_{\text{HH}} = 6.6$ Hz, 1H, $\text{CHP}$ ), 0.23 (bq, $^1J_{\text{HB}} = 110.1$ Hz, 3H, $\text{BH}_3$ ). |                                                                                                          |                               |                               |                                                                                                                                                                                                                                                                                                                                                                              |                                                                    |              |                                                 |
| $^{13}\text{C}$ NMR ( $\text{CDCl}_3$ , 101 MHz, 298 K) $\delta$ (ppm) = 174.6 (s, CN), 74.7 (s, $\text{CH}_2\text{O}$ ), 63.9 (d, $^2J_{\text{CP}} = 3.7$ Hz, CHN), 37.8 (s, $\text{CH}_2\text{C}_{\text{Ad}}$ ), 37.7 (s, $\text{CH}_2\text{C}_{\text{Ad}}$ ), 37.5 (d, $J_{\text{CP}} = 25.8$ Hz, $\text{C}_{\text{AdP}}$ ), 36.5 (s, $\text{CH}_2\text{CH}_{\text{Ad}}$ ), 36.4 (s, $\text{CH}_2\text{CH}_{\text{Ad}}$ ), 36.2 (d, $J_{\text{CP}} = 26.8$ Hz, $\text{C}_{\text{AdP}}$ ), 33.2 (s, $\text{C}_{\text{tBu OX}}$ ), 28.1 (s, $\text{CHC}_{\text{Ad}}$ ), 28.1 (s, $\text{CHC}_{\text{Ad}}$ ), 28.0 (s, $\text{CH}_3\text{tBu OX}$ ), 22.3 (d, $J_{\text{CP}} = 26.8$ Hz, $\text{CH}_2\text{P}$ ).        |                                                                                                          |                               |                               |                                                                                                                                                                                                                                                                                                                                                                              |                                                                    |              |                                                 |
| $^{31}\text{P}\{^1\text{H}\}$ NMR ( $\text{CDCl}_3$ , 162 MHz, 298 K) $\delta$ (ppm) = 29.3 (m).                                                                                                                                                                                                                                                                                                                                                                                                                                                                                                                                                                                                                         |                                                                                                          |                               |                               | IR spectrum (neat) $\nu$ ( $\text{cm}^{-1}$ ) = 2903, 2849, 2409, 2383, 1656, 1478, 1469, 1450, 1411, 1359, 1343, 1304, 1269, 1183, 1144, 1103, 1077, 1052, 975, 930, 880, 836, 816, 801, 766.                                                                                                                                                                               |                                                                    |              |                                                 |
| HRMS (method: ESI+)<br>calculated for $\text{C}_{28}\text{H}_{46}\text{BNOP}$ [M-H]: 454.3404,<br>found 454.3389.                                                                                                                                                                                                                                                                                                                                                                                                                                                                                                                                                                                                        |                                                                                                          |                               |                               | relevant literature references: S. Nanchen, A. Pfaltz <i>Chem. Eur. J.</i> <b>2006</b> , <i>12</i> , 4550-4558; M. Diéguez, O. Pàmies <i>Chem. Eur. J.</i> <b>2008</b> , <i>14</i> , 3653-3669; D.-R. Hou, K. Burgess <i>Org. Lett.</i> <b>1999</b> , <i>1</i> , 1745-1747; D.-R. Hou, J. H. Reibenspies, K. Burgess <i>J. Org. Chem.</i> <b>2001</b> , <i>66</i> , 206-215. |                                                                    |              |                                                 |
| Separation Conditions                                                                                                                                                                                                                                                                                                                                                                                                                                                                                                                                                                                                                                                                                                    |                                                                                                          |                               |                               |                                                                                                                                                                                                                                                                                                                                                                              |                                                                    |              |                                                 |
| HPLC (column, $\lambda_1$ , $\lambda_2$ , eluent, flow rate, retention time):                                                                                                                                                                                                                                                                                                                                                                                                                                                                                                                                                                                                                                            |                                                                                                          |                               |                               | GC (column, method or sequence, retention time):                                                                                                                                                                                                                                                                                                                             |                                                                    |              |                                                 |

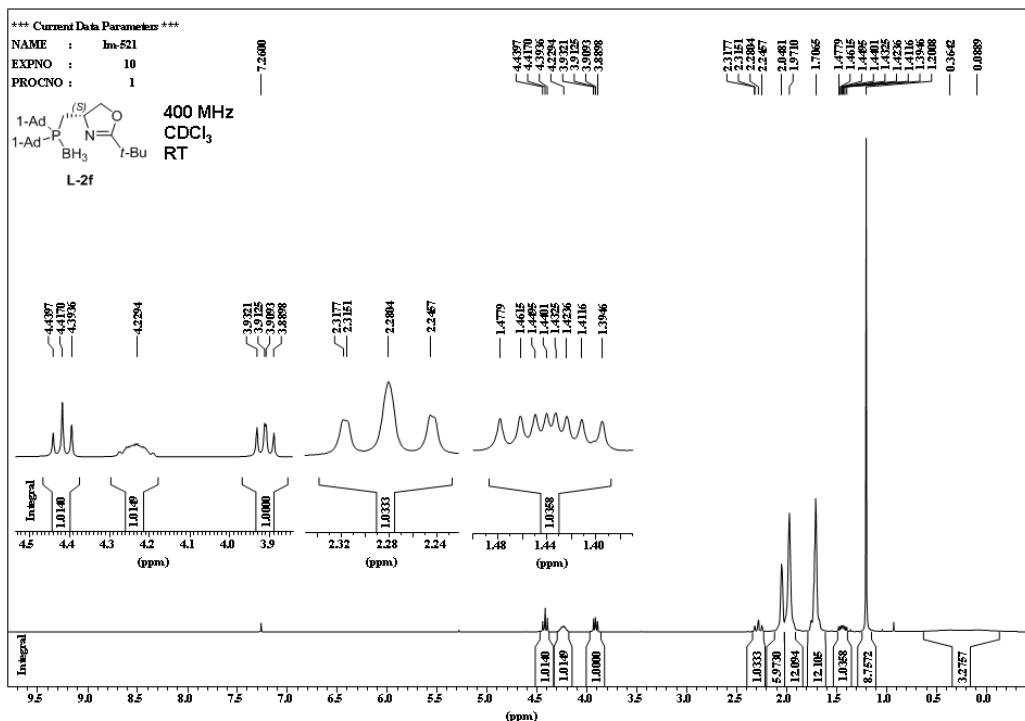

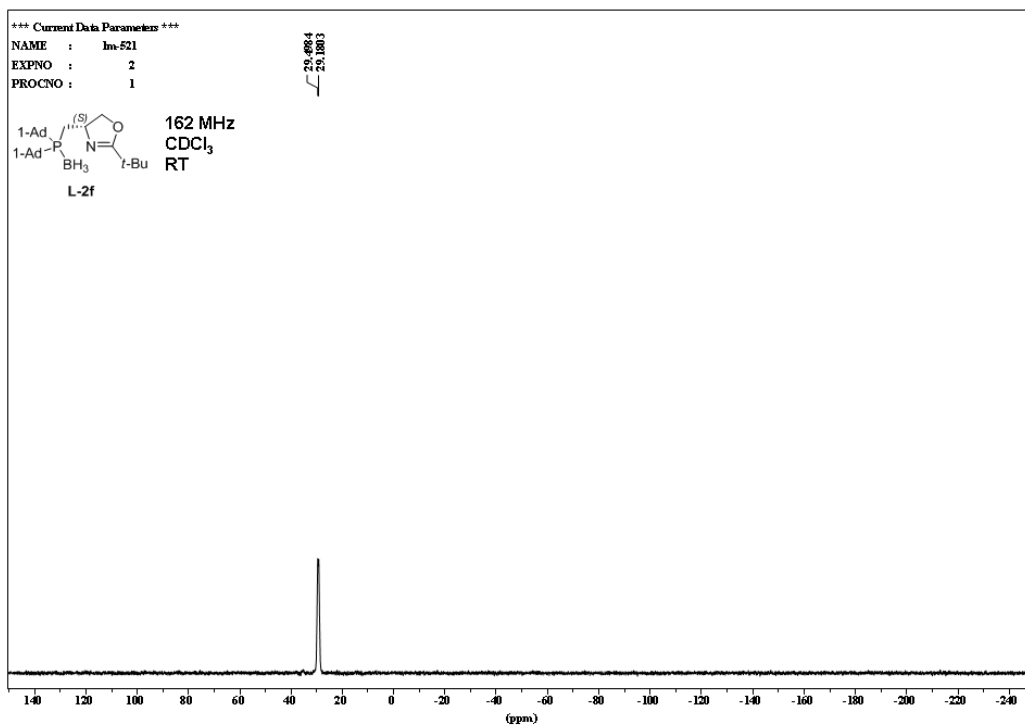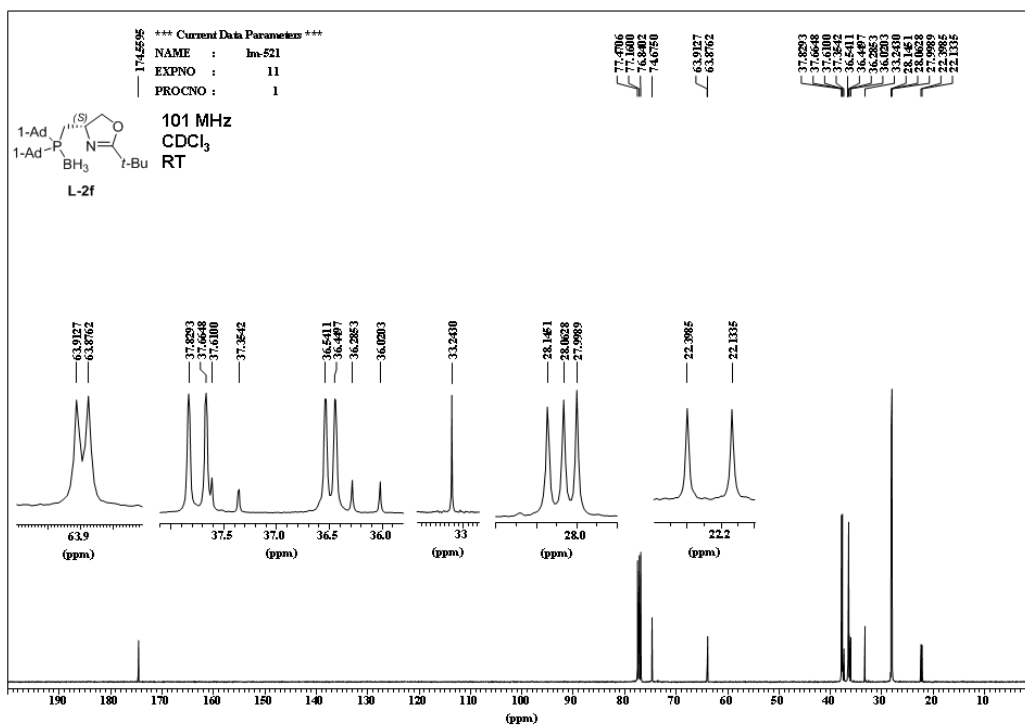

| Structure                                                                                                                                                                                                                                                                                                                                                                                                                                                                                                                                                                                                                                                                                                                                                                                                                                                                                                                                                                                                                                                                                                                                                                                                                                                                                                                                                | $^1\text{H}$                                                                                                                                                                    | $^{13}\text{C}\{^1\text{H}\}$ | $^{31}\text{P}\{^1\text{H}\}$ | IR                                                                                                                                                                                                                                                                                                                                                                                  | HRMS                                                                            | $[\alpha]_D$ | MAZET GROUP DATA FORM                                                 |
|----------------------------------------------------------------------------------------------------------------------------------------------------------------------------------------------------------------------------------------------------------------------------------------------------------------------------------------------------------------------------------------------------------------------------------------------------------------------------------------------------------------------------------------------------------------------------------------------------------------------------------------------------------------------------------------------------------------------------------------------------------------------------------------------------------------------------------------------------------------------------------------------------------------------------------------------------------------------------------------------------------------------------------------------------------------------------------------------------------------------------------------------------------------------------------------------------------------------------------------------------------------------------------------------------------------------------------------------------------|---------------------------------------------------------------------------------------------------------------------------------------------------------------------------------|-------------------------------|-------------------------------|-------------------------------------------------------------------------------------------------------------------------------------------------------------------------------------------------------------------------------------------------------------------------------------------------------------------------------------------------------------------------------------|---------------------------------------------------------------------------------|--------------|-----------------------------------------------------------------------|
|                                                                                                                                                                                                                                                                                                                                                                                                                                                                                                                                                                                                                                                                                                                                                                                                                                                                                                                                                                                                                                                                                                                                                                                                                                                                                                                                                          | <b>Name</b> (S)-4-[(Di-cyclohexylphosphoryl)-methyl]-2-(phenyl)-4,5-dihydrooxazoline-η¹-(1,5-cyclooctadiene) iridium(I) tetrakis-[3,5-bis(trifluoromethyl)phenyl]borate. LM-428 |                               |                               |                                                                                                                                                                                                                                                                                                                                                                                     |                                                                                 |              | <b>Formula</b> C <sub>62</sub> H <sub>56</sub> BF <sub>24</sub> IrNOP |
|                                                                                                                                                                                                                                                                                                                                                                                                                                                                                                                                                                                                                                                                                                                                                                                                                                                                                                                                                                                                                                                                                                                                                                                                                                                                                                                                                          | <b>Properties</b> orange-beige solid                                                                                                                                            |                               |                               |                                                                                                                                                                                                                                                                                                                                                                                     |                                                                                 |              |                                                                       |
| <b>Molecular Weight</b> 1521.08                                                                                                                                                                                                                                                                                                                                                                                                                                                                                                                                                                                                                                                                                                                                                                                                                                                                                                                                                                                                                                                                                                                                                                                                                                                                                                                          | tlc conditions: SiO <sub>2</sub> , CH <sub>2</sub> Cl <sub>2</sub><br><i>R<sub>f</sub></i> = 0.89 (UV)                                                                          |                               |                               |                                                                                                                                                                                                                                                                                                                                                                                     | $[\alpha]_D^{26} = +38.2$<br><i>c</i> 1.0. in CH <sub>2</sub> Cl <sub>2</sub> . |              | <i>Mp</i> = 73-75°C                                                   |
| <b><math>^1\text{H}</math> NMR (CDCl<sub>3</sub>, 500 MHz, 298 K)</b> $\delta$ (ppm) = 8.16 (m, 2H, H <sub>ar</sub> Ph), 7.72 (s, 8H, H <sub>o</sub> BArF), 7.53 (m, 4H, H <sub>p</sub> BArF), 5.05 (m, 1H, CH <sub>COOD</sub> ), 4.80 (m, 1H, CH <sub>COOD</sub> ), 4.57 (m, 2H, CH <sub>2</sub> O), 4.37 (m, 1H, CHN), 3.73 (m, 1H, CH <sub>COOD</sub> ), 3.60 (m, 1H, CH <sub>COOD</sub> ), 2.49-1.22 (m, 22H, H <sub>cy</sub> , 8H, CH <sub>2</sub> COOD, 2H, CH <sub>2</sub> P).                                                                                                                                                                                                                                                                                                                                                                                                                                                                                                                                                                                                                                                                                                                                                                                                                                                                    |                                                                                                                                                                                 |                               |                               |                                                                                                                                                                                                                                                                                                                                                                                     |                                                                                 |              |                                                                       |
| <b><math>^{13}\text{C}\{^1\text{H}\}</math> NMR (CDCl<sub>3</sub>, 126 MHz, 298 K)</b> $\delta$ (ppm) = 170.4 (s, CN), 161.9 (q, $^1J_{\text{CB}} = 49.9$ Hz, C <sub>ipso</sub> BArF), 135.1 (s, C <sub>par</sub> Ph), 135.0 (s, C <sub>o</sub> BArF), 131.0 (s, C <sub>ar</sub> Ph), 129.0 (q, $^2J_{\text{CF}} = 31.5$ Hz, CCF <sub>3</sub> ), 128.9 (s, C <sub>ar</sub> Ph), 124.7 (q, $^1J_{\text{CF}} = 273.3$ Hz, CF <sub>3</sub> ), 123.2 (s, C <sub>ipso</sub> Ph), 117.6 (s, C <sub>p</sub> BArF), 94.6 (d, $^2J_{\text{CP}} = 8.3$ Hz, CH <sub>COOD</sub> ), 84.1 (d, $^2J_{\text{CP}} = 14.7$ Hz, CH <sub>COOD</sub> ), 72.0 (d, $^3J_{\text{CP}} = 11.9$ Hz, CH <sub>2</sub> O), 71.0 (d, $^2J_{\text{CP}} = 4.6$ Hz, CHN), 66.7 (s, CH <sub>COOD</sub> ), 63.0 (s, CH <sub>COOD</sub> ), 36.5 (d, $^3J_{\text{CP}} = 3.7$ Hz, CH <sub>2</sub> COOD), 34.7 (d, $^1J_{\text{CP}} = 25.7$ Hz, CH <sub>2</sub> O), 32.2 (d, $^1J_{\text{CP}} = 28.5$ Hz, CH <sub>2</sub> O), 32.2 (s, CH <sub>2</sub> COOD), 30.4 (d, $^2J_{\text{CP}} = 1.8$ Hz, CH <sub>2</sub> O), 30.1 (d, $^2J_{\text{CP}} = 2.8$ Hz, CH <sub>2</sub> O), 29.3 (s, CH <sub>2</sub> O), 29.1 (s, CH <sub>2</sub> COOD), 28.0 (s, CH <sub>2</sub> O), 26.0 (s, CH <sub>2</sub> O), 25.8 (s, CH <sub>2</sub> COOD), 25.0 (d, $^1J_{\text{CP}} = 28.5$ Hz, CH <sub>2</sub> P). |                                                                                                                                                                                 |                               |                               |                                                                                                                                                                                                                                                                                                                                                                                     |                                                                                 |              |                                                                       |
| <b><math>^{31}\text{P}\{^1\text{H}\}</math> NMR (CDCl<sub>3</sub>, 202 MHz, 298 K)</b> $\delta$ (ppm) = 28.5 (s).                                                                                                                                                                                                                                                                                                                                                                                                                                                                                                                                                                                                                                                                                                                                                                                                                                                                                                                                                                                                                                                                                                                                                                                                                                        |                                                                                                                                                                                 |                               |                               | <b>IR spectrum (neat)</b> $\nu$ (cm <sup>-1</sup> ) = 2935, 2859, 1610, 1577, 1495, 1450, 1353, 1273, 1158, 1116, 1002, 975, 934, 886, 839, 777, 744, 712, 682, 669.                                                                                                                                                                                                                |                                                                                 |              |                                                                       |
| <b>HRMS</b> (method: ESI+ )<br>calculated for C <sub>30</sub> H <sub>44</sub> IrNOP [M-BArF] <sup>+</sup> : 658.2784,<br>found 658.2805.                                                                                                                                                                                                                                                                                                                                                                                                                                                                                                                                                                                                                                                                                                                                                                                                                                                                                                                                                                                                                                                                                                                                                                                                                 |                                                                                                                                                                                 |                               |                               | <b>relevant literature references:</b> S. Nanchen, A. Pfaltz <i>Chem. Eur. J.</i> <b>2006</b> , <i>12</i> , 4550-4558; M. Diéguez, O. Pàmies <i>Chem. Eur. J.</i> <b>2008</b> , <i>14</i> , 3653-3669; D.-R. Hou, K. Burgess <i>Org. Lett.</i> <b>1999</b> , <i>1</i> , 1745-1747; D.-R. Hou, J. H. Reibenspies, K. Burgess <i>J. Org. Chem.</i> <b>2001</b> , <i>66</i> , 206-215. |                                                                                 |              |                                                                       |
| Separation Conditions                                                                                                                                                                                                                                                                                                                                                                                                                                                                                                                                                                                                                                                                                                                                                                                                                                                                                                                                                                                                                                                                                                                                                                                                                                                                                                                                    |                                                                                                                                                                                 |                               |                               |                                                                                                                                                                                                                                                                                                                                                                                     |                                                                                 |              |                                                                       |
| <b>HPLC</b> (column, $\lambda_1$ , $\lambda_2$ , eluent, flow rate, retention time):                                                                                                                                                                                                                                                                                                                                                                                                                                                                                                                                                                                                                                                                                                                                                                                                                                                                                                                                                                                                                                                                                                                                                                                                                                                                     |                                                                                                                                                                                 |                               |                               | <b>GC</b> (column, method or sequence, retention time):                                                                                                                                                                                                                                                                                                                             |                                                                                 |              |                                                                       |

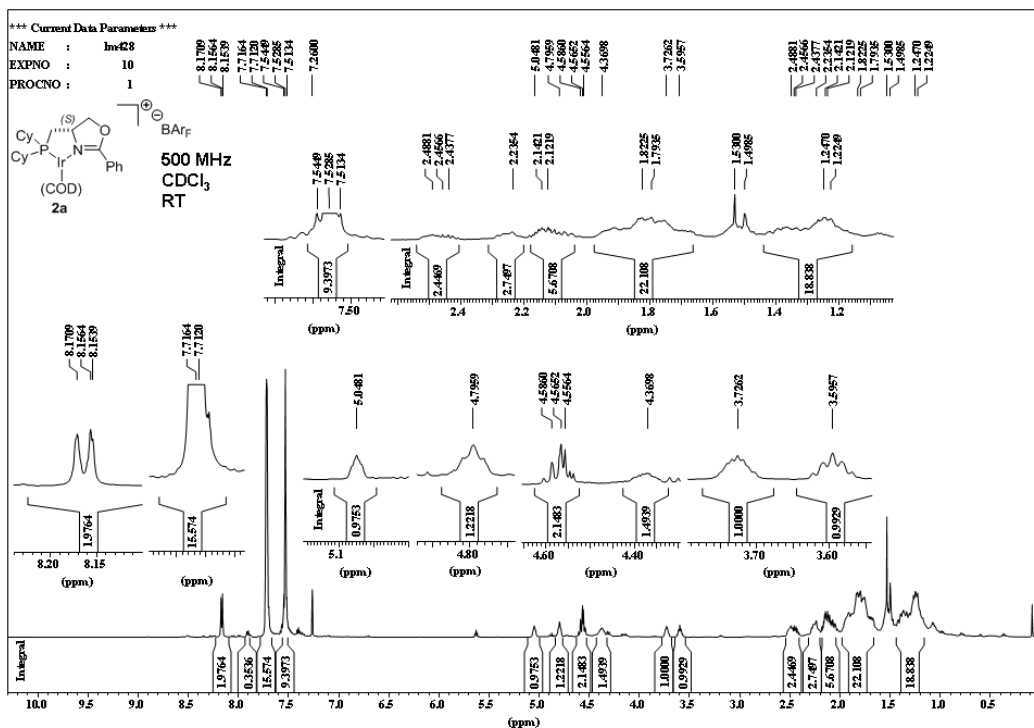





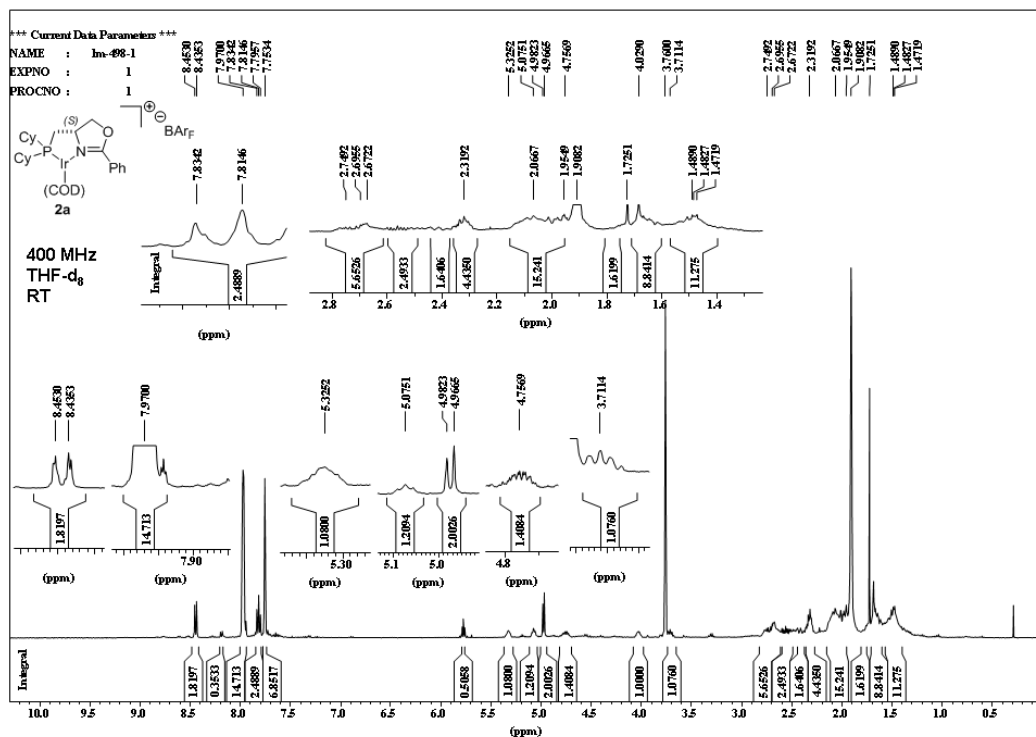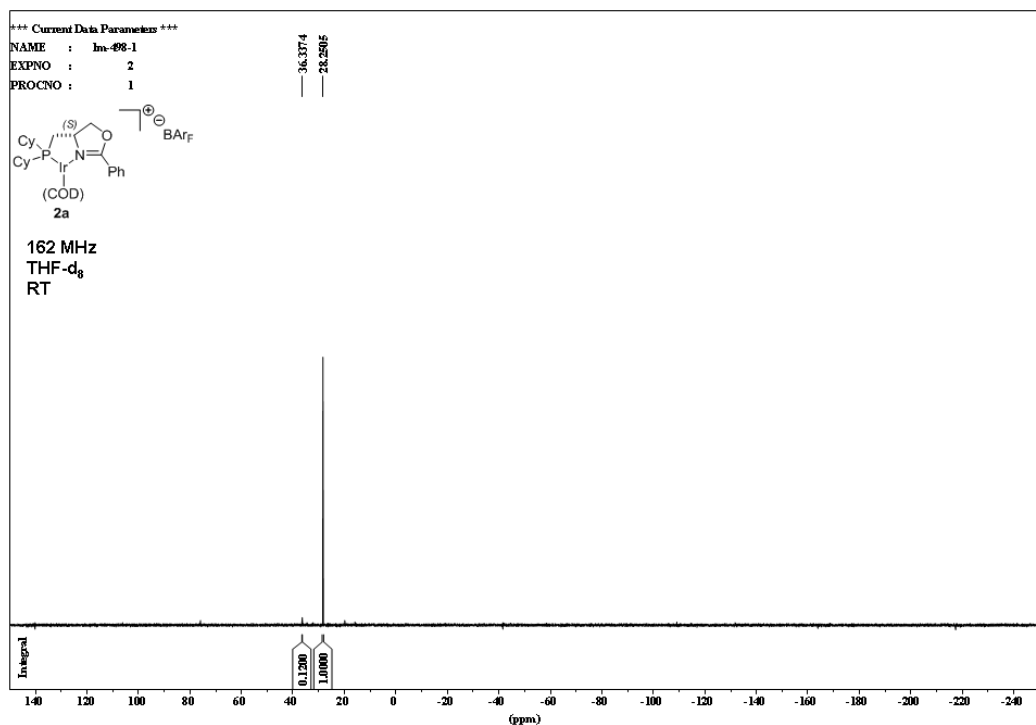



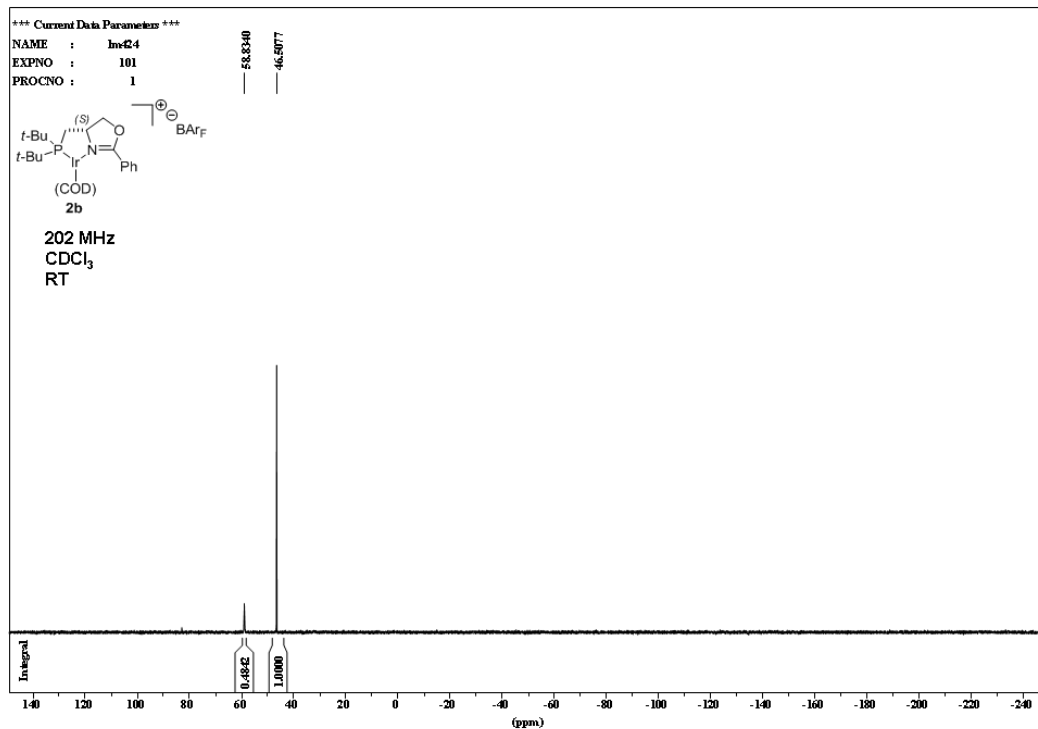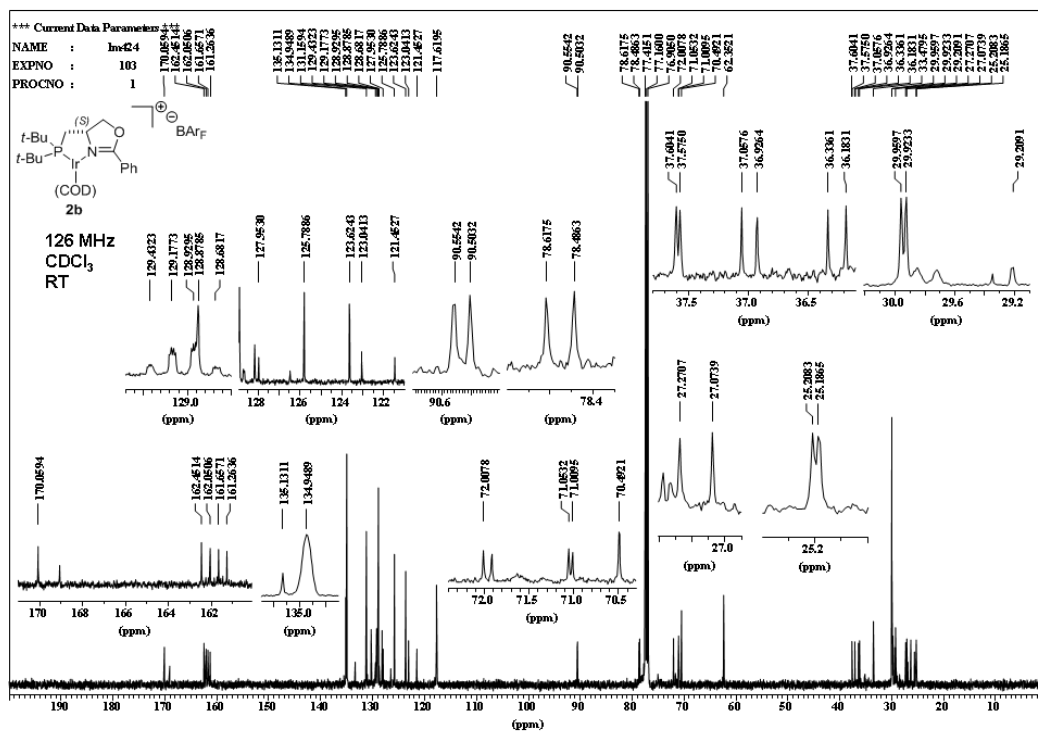



| Structure                                                                                                                                                                                                                                                                                                                                                                                                                                                                                                                                                                                                                                                                                                                                                                                                                                                                                                                                                                                                                                                                                                                                                                                                                                                                                                                                                                                                          | $^1\text{H}$                                                                                                                                                            | $^{13}\text{C}\{^1\text{H}\}$ | $^{31}\text{P}\{^1\text{H}\}$ | IR                                                                                                                                                                                                                                                                                                                                                                           | HRMS | $[\alpha]_D$         | MAZET GROUP DATA FORM |
|--------------------------------------------------------------------------------------------------------------------------------------------------------------------------------------------------------------------------------------------------------------------------------------------------------------------------------------------------------------------------------------------------------------------------------------------------------------------------------------------------------------------------------------------------------------------------------------------------------------------------------------------------------------------------------------------------------------------------------------------------------------------------------------------------------------------------------------------------------------------------------------------------------------------------------------------------------------------------------------------------------------------------------------------------------------------------------------------------------------------------------------------------------------------------------------------------------------------------------------------------------------------------------------------------------------------------------------------------------------------------------------------------------------------|-------------------------------------------------------------------------------------------------------------------------------------------------------------------------|-------------------------------|-------------------------------|------------------------------------------------------------------------------------------------------------------------------------------------------------------------------------------------------------------------------------------------------------------------------------------------------------------------------------------------------------------------------|------|----------------------|-----------------------|
| 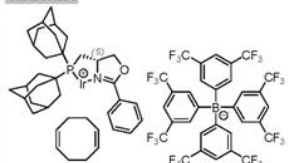                                                                                                                                                                                                                                                                                                                                                                                                                                                                                                                                                                                                                                                                                                                                                                                                                                                                                                                                                                                                                                                                                                                                                                                                                                                                                                                                  | Name (S)-4-[(di-1-adamantylphosphanyl)-methyl]-2-(phenyl)-4,5-dihydrooxoline-η¹-(1,5-cyclooctadiene) iridium(I) tetrakis-[3,5-bis(trifluoromethyl)phenyl]borate. LM-426 |                               |                               |                                                                                                                                                                                                                                                                                                                                                                              |      |                      |                       |
|                                                                                                                                                                                                                                                                                                                                                                                                                                                                                                                                                                                                                                                                                                                                                                                                                                                                                                                                                                                                                                                                                                                                                                                                                                                                                                                                                                                                                    | Properties orange solid                                                                                                                                                 |                               |                               | Formula C <sub>70</sub> H <sub>64</sub> BF <sub>2</sub> IrNOP                                                                                                                                                                                                                                                                                                                |      |                      |                       |
| Molecular Weight 1625.23                                                                                                                                                                                                                                                                                                                                                                                                                                                                                                                                                                                                                                                                                                                                                                                                                                                                                                                                                                                                                                                                                                                                                                                                                                                                                                                                                                                           | tlc conditions: SiO <sub>2</sub> , CH <sub>2</sub> Cl <sub>2</sub><br><i>R</i> <sub>f</sub> = 0.86 (UV)                                                                 |                               |                               | $[\alpha]_D^{26} = +32.0$<br>c 1.0. in CH <sub>2</sub> Cl <sub>2</sub> .                                                                                                                                                                                                                                                                                                     |      | <i>M</i> p = 94-96°C |                       |
| $^1\text{H}$ NMR (CDCl <sub>3</sub> , 500 MHz, 298 K) $\delta$ (ppm) = 8.21 (m, 2H, H <sub>Oph</sub> ), 7.73 (s, 8H, H <sub>OBArf</sub> ), 7.70 (m, 1H, H <sub>Pph</sub> ), 7.53 (s, 4H, H <sub>PBArf</sub> ), 7.52 (m, 2H, H <sub>mPh</sub> ), 5.30 (m, 1H, CH <sub>COD</sub> ), 4.81 (m, 1H, CH <sub>COD</sub> ), 4.62 (m, 2H, CH <sub>2</sub> O, 1H, CH <sub>COD</sub> ), 4.43 (m, 1H, CHN), 3.29 (m, 1H, CH <sub>COD</sub> ), 2.65-1.24 (m, 30H, H <sub>Ad</sub> , 8H, CH <sub>2</sub> COD, 2H, CH <sub>2</sub> P).                                                                                                                                                                                                                                                                                                                                                                                                                                                                                                                                                                                                                                                                                                                                                                                                                                                                                            |                                                                                                                                                                         |                               |                               |                                                                                                                                                                                                                                                                                                                                                                              |      |                      |                       |
| $^{13}\text{C}\{^1\text{H}\}$ NMR (CDCl <sub>3</sub> , 126 MHz, 298 K) $\delta$ (ppm) = 169.9 (s, CN), 161.9 (q, $J_{\text{CB}} = 49.9$ Hz, C <sub>ipsoBArf</sub> ), 134.9 (s, C <sub>OBArf</sub> , C <sub>Pph</sub> ), 130.9 (s, C <sub>Oph</sub> ), 129.0 (q, $J_{\text{CF}} = 32.4$ Hz, CCF <sub>3</sub> ), 128.8 (s, C <sub>mPh</sub> ), 124.7 (q, $J_{\text{CF}} = 273.3$ Hz, CF <sub>3</sub> ), 123.3 (s, C <sub>ipsoPh</sub> ), 117.6 (s, C <sub>PBArf</sub> ), 88.3 (d, $J_{\text{CP}} = 6.4$ Hz, CH <sub>2</sub> COD), 76.7 (d, $J_{\text{CP}} = 16.5$ Hz, CH <sub>2</sub> COD), 72.0 (d, $J_{\text{CP}} = 11.1$ Hz, CH <sub>2</sub> O), 71.6 (d, $J_{\text{CP}} = 5.5$ Hz, CHN), 71.2 (s, CH <sub>2</sub> COD), 62.1 (s, CH <sub>2</sub> COD), 42.9 (d, $J_{\text{CP}} = 15.6$ Hz, C <sub>AdP</sub> ), 42.6 (d, $J_{\text{CP}} = 13.8$ Hz, C <sub>AdP</sub> ), 41.4 (s, CH <sub>2</sub> C <sub>Ad</sub> ), 40.6 (s, CH <sub>2</sub> C <sub>Ad</sub> ), 37.7 (d, $J_{\text{CP}} = 4.6$ Hz, CH <sub>2</sub> COD), 36.3 (s, CH <sub>2</sub> CH <sub>Ad</sub> ), 36.2 (s, CH <sub>2</sub> CH <sub>Ad</sub> ), 33.7 (s, CH <sub>2</sub> COD), 29.1 (s, CH <sub>2</sub> COD), 28.4 (d, $J_{\text{CP}} = 8.3$ Hz, CHC <sub>Ad</sub> ), 28.3 (d, $J_{\text{CP}} = 9.2$ Hz, CHC <sub>Ad</sub> ), 25.2 (d, $J_{\text{CP}} = 2.7$ Hz, CH <sub>2</sub> COD), 23.2 (d, $J_{\text{CP}} = 24.8$ Hz, CH <sub>2</sub> P). |                                                                                                                                                                         |                               |                               |                                                                                                                                                                                                                                                                                                                                                                              |      |                      |                       |
| $^{31}\text{P}\{^1\text{H}\}$ NMR (CDCl <sub>3</sub> , 202 MHz, 298 K) $\delta$ (ppm) = 38.6 (s).                                                                                                                                                                                                                                                                                                                                                                                                                                                                                                                                                                                                                                                                                                                                                                                                                                                                                                                                                                                                                                                                                                                                                                                                                                                                                                                  |                                                                                                                                                                         |                               |                               | IR spectrum (neat) $\nu$ (cm <sup>-1</sup> ) = 2910, 2856, 1610, 1599, 1575, 1497, 1452, 1353, 1273, 1158, 1117, 971, 940, 886, 839, 777, 745, 712, 700, 682, 669.                                                                                                                                                                                                           |      |                      |                       |
| HRMS (method: ESI+ )<br>calculated for C <sub>38</sub> H <sub>52</sub> IrNOP [M-BArf] <sup>+</sup> : 762.3410,<br>found 762.3414.                                                                                                                                                                                                                                                                                                                                                                                                                                                                                                                                                                                                                                                                                                                                                                                                                                                                                                                                                                                                                                                                                                                                                                                                                                                                                  |                                                                                                                                                                         |                               |                               | relevant literature references: S. Nanchen, A. Pfaltz <i>Chem. Eur. J.</i> <b>2006</b> , <i>12</i> , 4550-4558; M. Diéguez, O. Pàmies <i>Chem. Eur. J.</i> <b>2008</b> , <i>14</i> , 3653-3669; D.-R. Hou, K. Burgess <i>Org. Lett.</i> <b>1999</b> , <i>1</i> , 1745-1747; D.-R. Hou, J. H. Reibenspies, K. Burgess <i>J. Org. Chem.</i> <b>2001</b> , <i>66</i> , 206-215. |      |                      |                       |
| Separation Conditions                                                                                                                                                                                                                                                                                                                                                                                                                                                                                                                                                                                                                                                                                                                                                                                                                                                                                                                                                                                                                                                                                                                                                                                                                                                                                                                                                                                              |                                                                                                                                                                         |                               |                               |                                                                                                                                                                                                                                                                                                                                                                              |      |                      |                       |
| HPLC (column, $\lambda_1$ , $\lambda_2$ , eluent, flow rate, retention time):                                                                                                                                                                                                                                                                                                                                                                                                                                                                                                                                                                                                                                                                                                                                                                                                                                                                                                                                                                                                                                                                                                                                                                                                                                                                                                                                      |                                                                                                                                                                         |                               |                               | GC (column, method or sequence, retention time):                                                                                                                                                                                                                                                                                                                             |      |                      |                       |

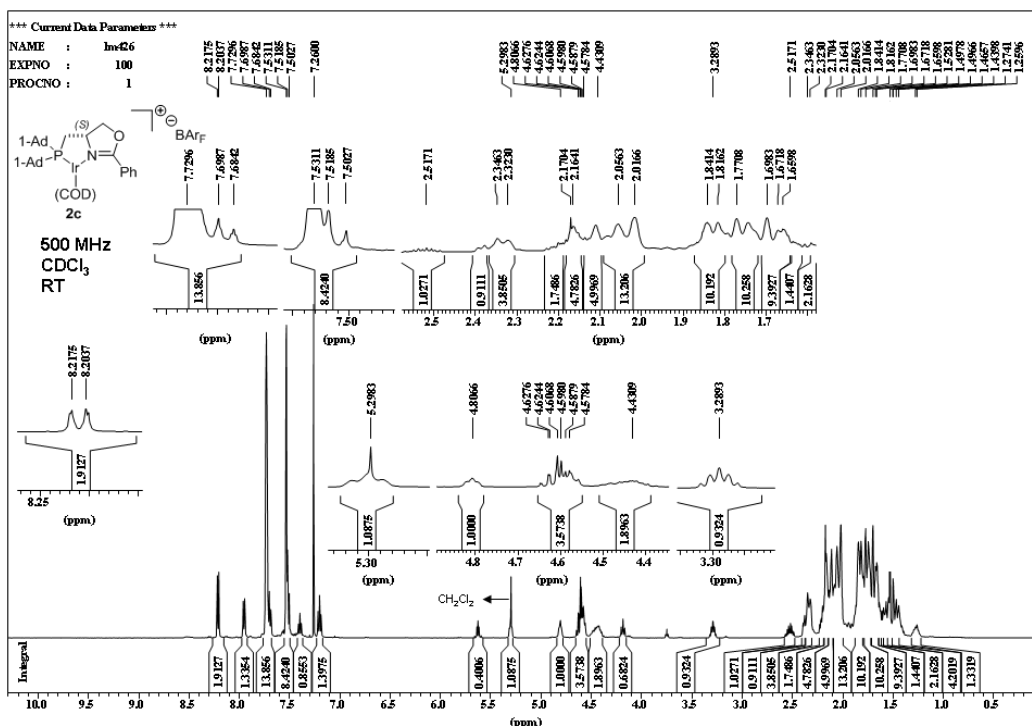

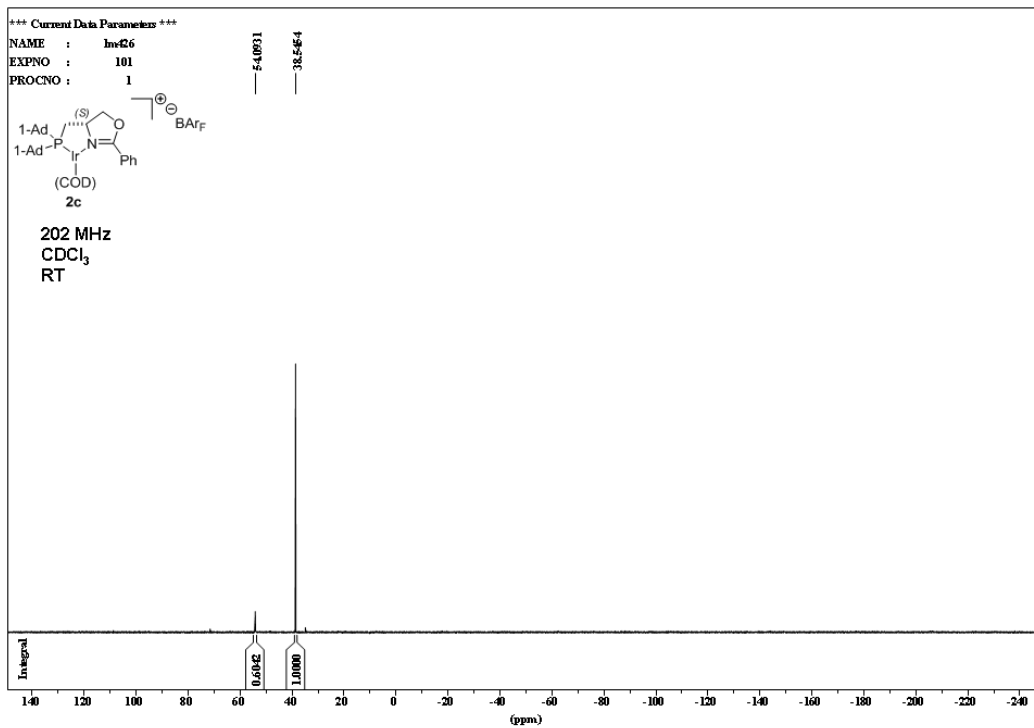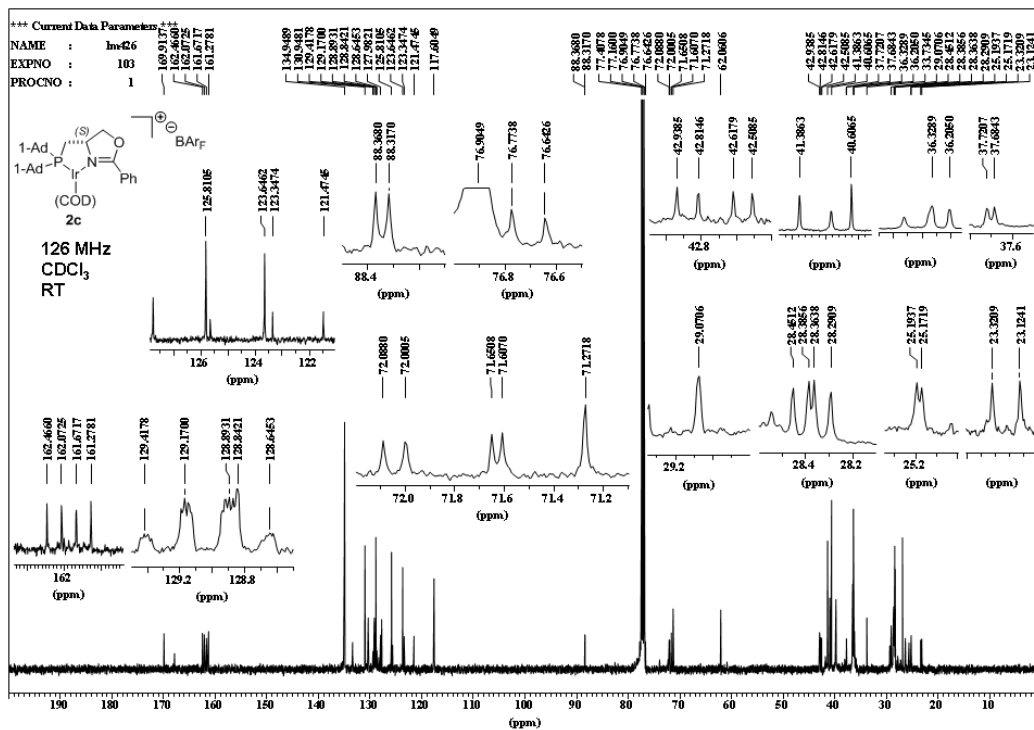

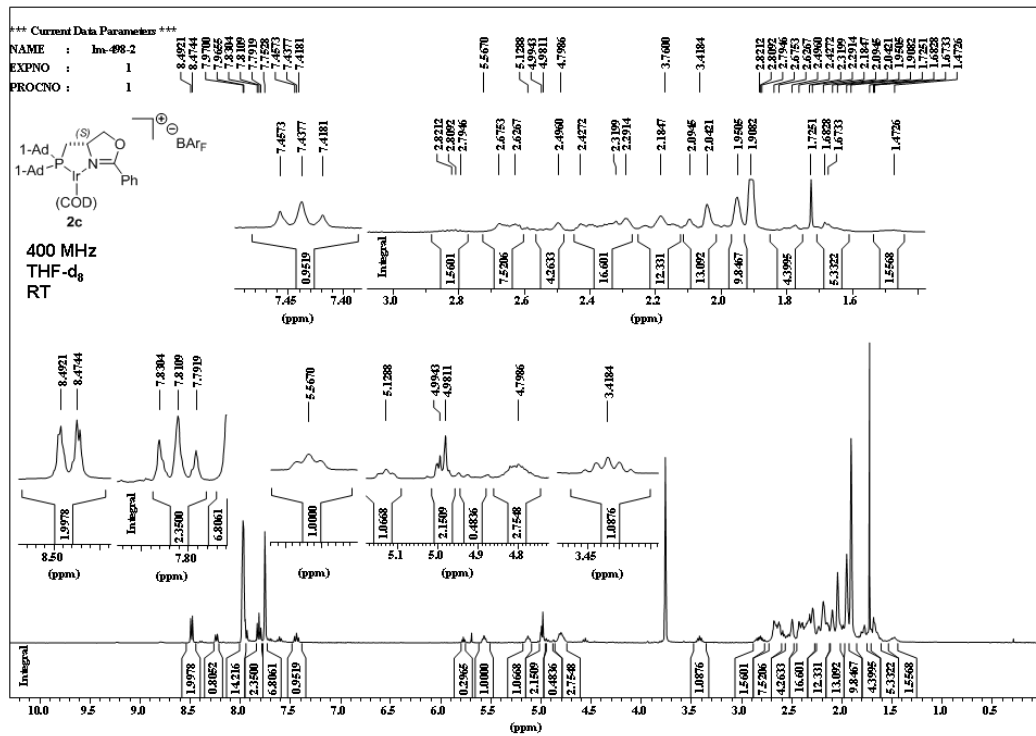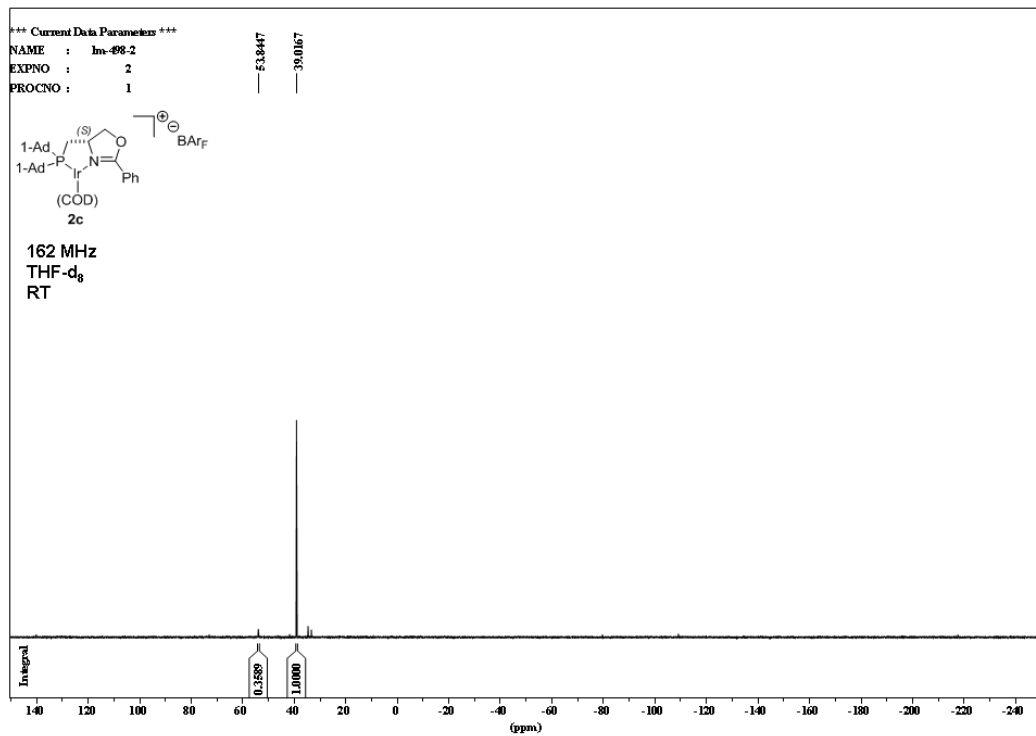



| Structure                                                                                                                                                                                                                                                                                                                                                                                                                                                                                                                                                                                                                                                                                                                                                                                                                                                                                                                                                                                                                                                                                                                                                                                                                                                                                                                                                                                                                                                                                                                                                                                                                                                                                         | <sup>1</sup> H                                                                                                                                                                                   | <sup>13</sup> C { <sup>1</sup> H} | <sup>31</sup> P { <sup>1</sup> H} | IR                                                                                                                                                                                                                                                                                                                                                                                  | HRMS | [α] <sub>D</sub>                                                                            | MAZET GROUP DATA FORM                                                 |
|---------------------------------------------------------------------------------------------------------------------------------------------------------------------------------------------------------------------------------------------------------------------------------------------------------------------------------------------------------------------------------------------------------------------------------------------------------------------------------------------------------------------------------------------------------------------------------------------------------------------------------------------------------------------------------------------------------------------------------------------------------------------------------------------------------------------------------------------------------------------------------------------------------------------------------------------------------------------------------------------------------------------------------------------------------------------------------------------------------------------------------------------------------------------------------------------------------------------------------------------------------------------------------------------------------------------------------------------------------------------------------------------------------------------------------------------------------------------------------------------------------------------------------------------------------------------------------------------------------------------------------------------------------------------------------------------------|--------------------------------------------------------------------------------------------------------------------------------------------------------------------------------------------------|-----------------------------------|-----------------------------------|-------------------------------------------------------------------------------------------------------------------------------------------------------------------------------------------------------------------------------------------------------------------------------------------------------------------------------------------------------------------------------------|------|---------------------------------------------------------------------------------------------|-----------------------------------------------------------------------|
| 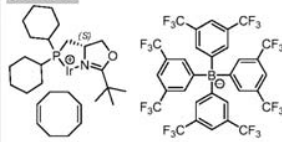                                                                                                                                                                                                                                                                                                                                                                                                                                                                                                                                                                                                                                                                                                                                                                                                                                                                                                                                                                                                                                                                                                                                                                                                                                                                                                                                                                                                                                                                                                                                                                                                                 | <b>Name</b> (S)-4-[(Di-cyclohexylphosphanyl)-methyl]-2-(tert-butyl)-4,5-dihydrooxazoline-η <sup>1</sup> -(1,5-cyclooctadiene) iridium(I) tetrakis-[3,5-bis(trifluoromethyl)phenyl]borate. LM-520 |                                   |                                   |                                                                                                                                                                                                                                                                                                                                                                                     |      |                                                                                             | <b>Formula</b> C <sub>60</sub> H <sub>60</sub> BF <sub>24</sub> IrNOP |
| <b>Properties</b> orange solid                                                                                                                                                                                                                                                                                                                                                                                                                                                                                                                                                                                                                                                                                                                                                                                                                                                                                                                                                                                                                                                                                                                                                                                                                                                                                                                                                                                                                                                                                                                                                                                                                                                                    |                                                                                                                                                                                                  |                                   |                                   |                                                                                                                                                                                                                                                                                                                                                                                     |      |                                                                                             |                                                                       |
| <b>Molecular Weight</b> 1501.09                                                                                                                                                                                                                                                                                                                                                                                                                                                                                                                                                                                                                                                                                                                                                                                                                                                                                                                                                                                                                                                                                                                                                                                                                                                                                                                                                                                                                                                                                                                                                                                                                                                                   | tlc conditions: SiO <sub>2</sub> , CH <sub>2</sub> Cl <sub>2</sub><br>R <sub>f</sub> = 0.86 (UV)                                                                                                 |                                   |                                   |                                                                                                                                                                                                                                                                                                                                                                                     |      | <b>[α]<sub>D</sub><sup>26</sup></b> = + 32.1<br>c 1.0. in CH <sub>2</sub> Cl <sub>2</sub> . |                                                                       |
| <b><sup>1</sup>H NMR (CDCl<sub>3</sub>, 500 MHz, 298 K)</b> δ (ppm) = 7.71 (s, 8H, H <sub>o</sub> BARF), 7.54 (m, 4H, H <sub>p</sub> BARF), 5.19 (m, 1H, CH <sub>COOD</sub> ), 4.70 (m, 1H, CH <sub>COOD</sub> ), 4.38 (d, <sup>2</sup> J <sub>HH</sub> = 7.3 Hz, 1H, CHO), 4.20 (d, <sup>2</sup> J <sub>HH</sub> = 7.3 Hz, 1H, CHO), 4.19 (m, 1H, CHN, 1H, CH <sub>COOD</sub> ), 3.60 (m, 1H, CH <sub>COOD</sub> ), 2.48-1.18 (m, 22H, H <sub>Cy</sub> , 8H, CH <sub>2</sub> COOD, 2H, CH <sub>2</sub> P), 1.41 (s, 9H, CH <sub>3</sub> BARF).                                                                                                                                                                                                                                                                                                                                                                                                                                                                                                                                                                                                                                                                                                                                                                                                                                                                                                                                                                                                                                                                                                                                                   |                                                                                                                                                                                                  |                                   |                                   |                                                                                                                                                                                                                                                                                                                                                                                     |      |                                                                                             |                                                                       |
| <b><sup>13</sup>C {<sup>1</sup>H} NMR (CDCl<sub>3</sub>, 126 MHz, 298 K)</b> δ (ppm) = 181.4 (s, CN), 161.9 (q, <sup>1</sup> J <sub>CB</sub> = 50.2 Hz, C <sub>ipso</sub> BARF), 134.9 (s, C <sub>o</sub> BARF), 129.0 (q, <sup>2</sup> J <sub>CF</sub> = 31.5 Hz, CCF <sub>3</sub> ), 124.7 (q, <sup>1</sup> J <sub>CF</sub> = 273.3 Hz, CF <sub>3</sub> ), 117.6 (s, C <sub>p</sub> BARF), 92.2 (d, <sup>2</sup> J <sub>CP</sub> = 6.4 Hz, CH <sub>COOD</sub> ), 81.2 (d, <sup>2</sup> J <sub>CP</sub> = 17.5 Hz, CH <sub>COOD</sub> ), 70.9 (d, <sup>3</sup> J <sub>CP</sub> = 11.9 Hz, CH <sub>2</sub> O), 69.8 (d, <sup>2</sup> J <sub>CP</sub> = 5.5 Hz, CHN), 66.4 (s, CH <sub>COOD</sub> ), 61.8 (s, CH <sub>COOD</sub> ), 37.9 (d, <sup>2</sup> J <sub>CP</sub> = 4.6 Hz, CH <sub>2</sub> COOD), 35.2 (d, <sup>1</sup> J <sub>CP</sub> = 24.8 Hz, CH <sub>2</sub> ), 34.3 (s, C <sub>BARF</sub> O), 33.7 (s, CH <sub>2</sub> COOD), 30.9 (d, <sup>1</sup> J <sub>CP</sub> = 29.4 Hz, CH <sub>2</sub> ), 30.4 (d, <sup>2</sup> J <sub>CP</sub> = 2.8 Hz, CH <sub>2</sub> ), 29.1 (s, CH <sub>3</sub> BARF O), 28.9 (s, CH <sub>2</sub> COOD), 28.6 (s, CH <sub>2</sub> ), 27.9 (s, CH <sub>2</sub> ), 26.9 (d, <sup>3</sup> J <sub>CP</sub> = 12.9 Hz, CH <sub>2</sub> ), 26.6 (d, <sup>3</sup> J <sub>CP</sub> = 11.0 Hz, CH <sub>2</sub> ), 26.5 (d, <sup>3</sup> J <sub>CP</sub> = 14.7 Hz, CH <sub>2</sub> ), 26.3 (d, <sup>3</sup> J <sub>CP</sub> = 11.9 Hz, CH <sub>2</sub> ), 26.0 (s, CH <sub>2</sub> ), 25.8 (s, CH <sub>2</sub> ), 25.2 (d, <sup>3</sup> J <sub>CP</sub> = 2.8 Hz, CH <sub>2</sub> COOD), 24.0 (d, <sup>1</sup> J <sub>CP</sub> = 29.4 Hz, CH <sub>2</sub> P). |                                                                                                                                                                                                  |                                   |                                   |                                                                                                                                                                                                                                                                                                                                                                                     |      |                                                                                             |                                                                       |
| <b><sup>31</sup>P {<sup>1</sup>H} NMR (CDCl<sub>3</sub>, 202 MHz, 298 K)</b> δ (ppm) = 24.5 (s).                                                                                                                                                                                                                                                                                                                                                                                                                                                                                                                                                                                                                                                                                                                                                                                                                                                                                                                                                                                                                                                                                                                                                                                                                                                                                                                                                                                                                                                                                                                                                                                                  |                                                                                                                                                                                                  |                                   |                                   | <b>IR spectrum (neat)</b> ν (cm <sup>-1</sup> ) = 2938, 2861, 1598, 1481, 1451, 1353, 1272, 1161, 1118, 997, 970, 887, 839, 744, 715, 682, 668.                                                                                                                                                                                                                                     |      |                                                                                             |                                                                       |
| <b>HRMS (method: ESI+)</b><br>calculated for C <sub>28</sub> H <sub>48</sub> IrNOP [M-BARF] <sup>+</sup> : 638.3097,<br>found. 638.3122.                                                                                                                                                                                                                                                                                                                                                                                                                                                                                                                                                                                                                                                                                                                                                                                                                                                                                                                                                                                                                                                                                                                                                                                                                                                                                                                                                                                                                                                                                                                                                          |                                                                                                                                                                                                  |                                   |                                   | <b>relevant literature references:</b> S. Nanchen, A. Pfaltz <i>Chem. Eur. J.</i> <b>2006</b> , <i>12</i> , 4550-4558; M. Diéguez, O. Pàmies <i>Chem. Eur. J.</i> <b>2008</b> , <i>14</i> , 3653-3669; D.-R. Hou, K. Burgess <i>Org. Lett.</i> <b>1999</b> , <i>1</i> , 1745-1747; D.-R. Hou, J. H. Reibenspies, K. Burgess <i>J. Org. Chem.</i> <b>2001</b> , <i>66</i> , 206-215. |      |                                                                                             |                                                                       |
| Separation Conditions                                                                                                                                                                                                                                                                                                                                                                                                                                                                                                                                                                                                                                                                                                                                                                                                                                                                                                                                                                                                                                                                                                                                                                                                                                                                                                                                                                                                                                                                                                                                                                                                                                                                             |                                                                                                                                                                                                  |                                   |                                   |                                                                                                                                                                                                                                                                                                                                                                                     |      |                                                                                             |                                                                       |
| <b>HPLC (column, λ<sub>1</sub>, λ<sub>2</sub>, eluent, flow rate, retention time):</b>                                                                                                                                                                                                                                                                                                                                                                                                                                                                                                                                                                                                                                                                                                                                                                                                                                                                                                                                                                                                                                                                                                                                                                                                                                                                                                                                                                                                                                                                                                                                                                                                            |                                                                                                                                                                                                  |                                   |                                   | <b>GC (column, method or sequence, retention time):</b>                                                                                                                                                                                                                                                                                                                             |      |                                                                                             |                                                                       |

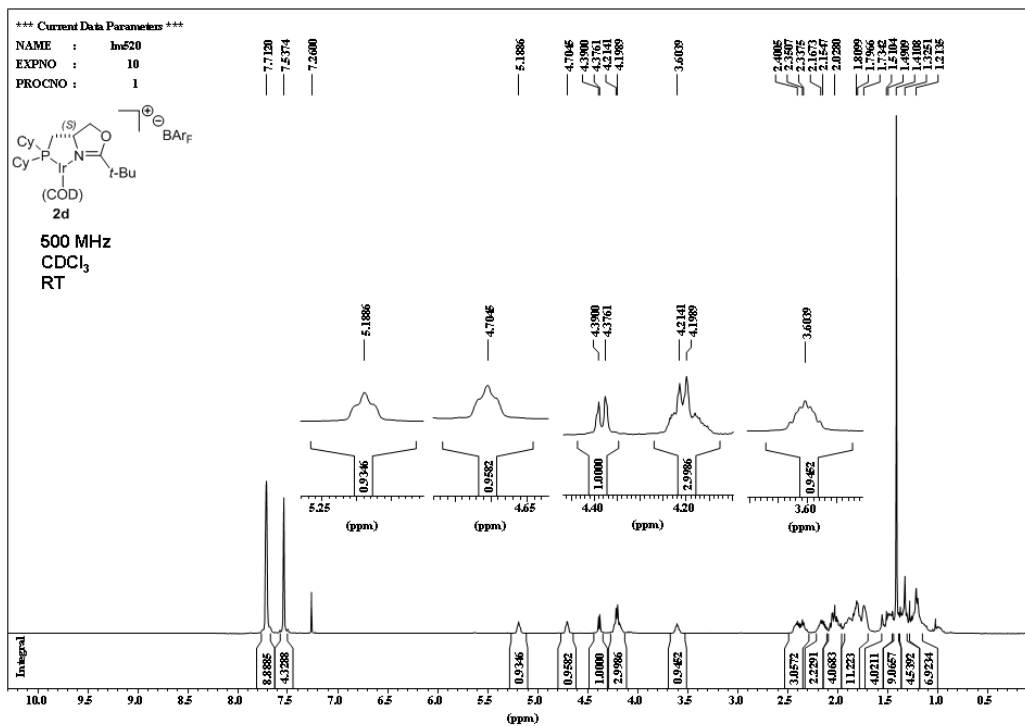



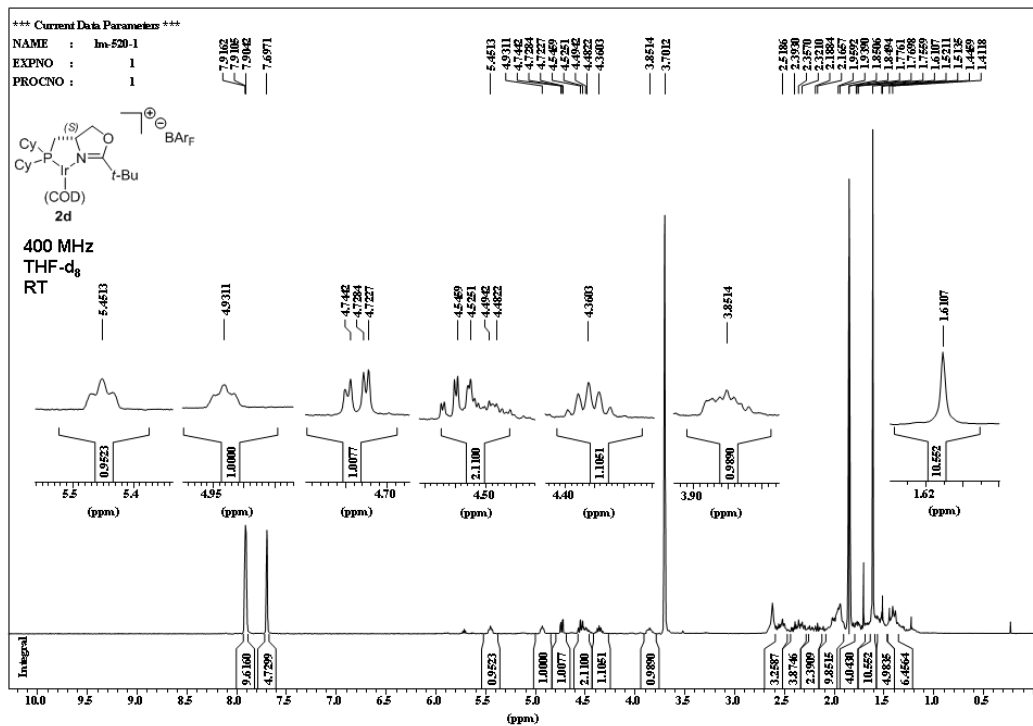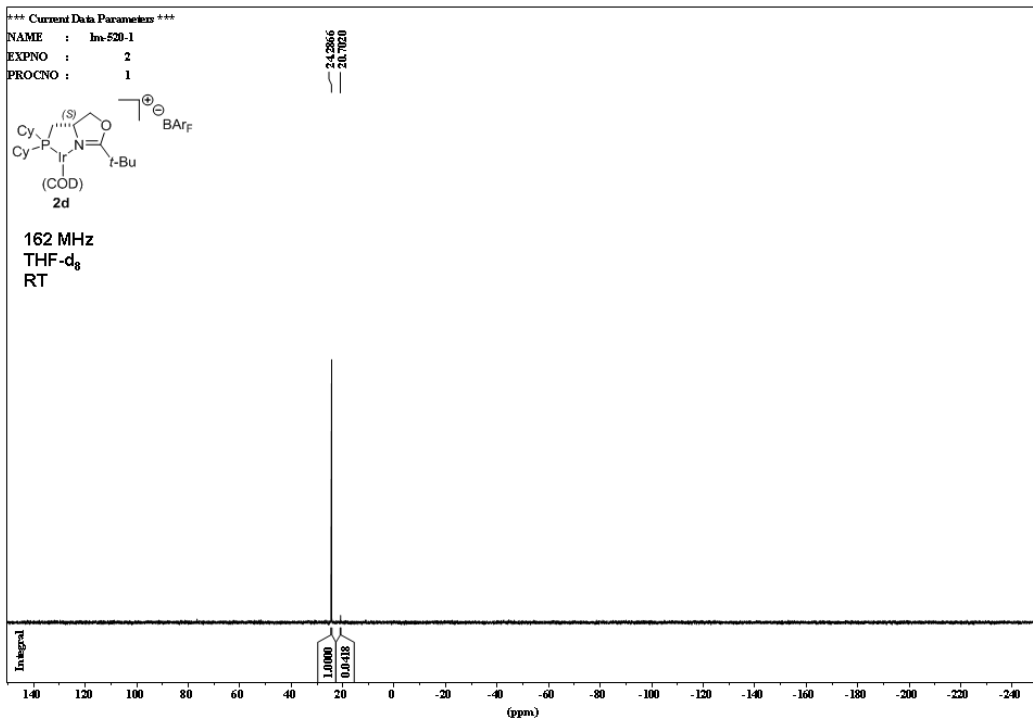

| Structure                                                                                                                                                                                                                                                                                                                                                                                                                                                                                                                                                                                                                                                                                                                                                                                                                                                                                                                                                                                                                                                                                                                                                                                                                                                     | $^1\text{H}$                                                                                                                                                                        | $^{13}\text{C}\{^1\text{H}\}$ | $^{31}\text{P}\{^1\text{H}\}$ | IR                                                                                                                                                                                                                                                                                                                                                                                  | HRMS | $[\alpha]_D$                                                                    | MAZET GROUP DATA FORM            |
|---------------------------------------------------------------------------------------------------------------------------------------------------------------------------------------------------------------------------------------------------------------------------------------------------------------------------------------------------------------------------------------------------------------------------------------------------------------------------------------------------------------------------------------------------------------------------------------------------------------------------------------------------------------------------------------------------------------------------------------------------------------------------------------------------------------------------------------------------------------------------------------------------------------------------------------------------------------------------------------------------------------------------------------------------------------------------------------------------------------------------------------------------------------------------------------------------------------------------------------------------------------|-------------------------------------------------------------------------------------------------------------------------------------------------------------------------------------|-------------------------------|-------------------------------|-------------------------------------------------------------------------------------------------------------------------------------------------------------------------------------------------------------------------------------------------------------------------------------------------------------------------------------------------------------------------------------|------|---------------------------------------------------------------------------------|----------------------------------|
| 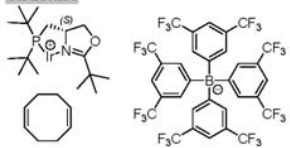                                                                                                                                                                                                                                                                                                                                                                                                                                                                                                                                                                                                                                                                                                                                                                                                                                                                                                                                                                                                                                                                                                                                                                             | <b>Name</b> (S)-4-[(Di-tert-butylphosphanyl)-methyl]-2-(tert-butyl)-4,5-dihydrooxazoline-η¹-(1,5-cyclooctadiene) iridium(I) tetrakis-[3,5-bis(trifluoromethyl)phenyl]borate. LM-518 |                               |                               |                                                                                                                                                                                                                                                                                                                                                                                     |      |                                                                                 |                                  |
|                                                                                                                                                                                                                                                                                                                                                                                                                                                                                                                                                                                                                                                                                                                                                                                                                                                                                                                                                                                                                                                                                                                                                                                                                                                               | <b>Properties</b> orange solid                                                                                                                                                      |                               |                               |                                                                                                                                                                                                                                                                                                                                                                                     |      | <b>Formula</b> C <sub>56</sub> H <sub>56</sub> BF <sub>24</sub> IrNOP           |                                  |
| <b>Molecular Weight</b> 1449.01                                                                                                                                                                                                                                                                                                                                                                                                                                                                                                                                                                                                                                                                                                                                                                                                                                                                                                                                                                                                                                                                                                                                                                                                                               | tlc conditions: SiO <sub>2</sub> , CH <sub>2</sub> Cl <sub>2</sub><br><i>R<sub>f</sub></i> = 0.89 (UV)                                                                              |                               |                               |                                                                                                                                                                                                                                                                                                                                                                                     |      | $[\alpha]_D^{26} = +20.5$<br><i>c</i> 1.0, in CH <sub>2</sub> Cl <sub>2</sub> . | <i>M<sub>p</sub></i> = 214-216°C |
| <b><math>^1\text{H}</math> NMR (CDCl<sub>3</sub>, 500 MHz, 298 K)</b> $\delta$ (ppm) = 7.71 (s, 8H, H <sub>o</sub> BArF), 7.53 (s, 4H, H <sub>p</sub> BArF), 5.04 (m, 1H, CH <sub>COOD</sub> ), 4.99 (m, 1H, CH <sub>COOD</sub> ), 4.41 (m, 1H, CHO), 4.34 (m, 1H, CH <sub>COOD</sub> ), 4.26 (m, 1H, CHN, 1H, CHO), 4.02 (m, 1H, CH <sub>COOD</sub> ), 2.40 (m, 2H, CH <sub>2</sub> COOD), 2.22 (m, 1H, CH <sub>2</sub> COOD), 2.05 (m, 1H, CH <sub>2</sub> COOD, 1H, CHP), 1.94 (m, 1H, CH <sub>2</sub> COOD), 1.79 (m, 1H, CH <sub>2</sub> COOD), 1.48 (m, 1H, CH <sub>2</sub> COOD, 1H, CHP), 1.43 (s, 9H, CH <sub>3</sub> tBu O <sub>2</sub> ), 1.38 (d, $^3J_{\text{HP}}$ = 13.6 Hz, 9H, CH <sub>3</sub> tBu), 1.16 (d, $^3J_{\text{HP}}$ = 14.5 Hz, 9H, CH <sub>3</sub> tBu).                                                                                                                                                                                                                                                                                                                                                                                                                                                                          |                                                                                                                                                                                     |                               |                               |                                                                                                                                                                                                                                                                                                                                                                                     |      |                                                                                 |                                  |
| <b><math>^{13}\text{C}\{^1\text{H}\}</math> NMR (CDCl<sub>3</sub>, 126 MHz, 298 K)</b> $\delta$ (ppm) = 181.3 (s, CN), 161.0 (q, $^1J_{\text{CB}}$ = 50.2 Hz, C <sub>ipso</sub> BArF), 134.9 (s, C <sub>o</sub> BArF), 129.0 (q, $^2J_{\text{CF}}$ = 31.5 Hz, CCF <sub>3</sub> ), 124.7 (q, $^1J_{\text{CF}}$ = 273.0 Hz, CF <sub>3</sub> ), 117.6 (s, C <sub>p</sub> BArF), 88.1 (d, $^1J_{\text{CP}}$ = 6.4 Hz, CH <sub>COOD</sub> ), 75.5 (d, $^2J_{\text{CP}}$ = 19.3 Hz, CH <sub>COOD</sub> ), 70.9 (d, $^3J_{\text{CP}}$ = 11.9 Hz, CH <sub>2</sub> O), 70.0 (s, CH <sub>COOD</sub> ), 69.9 (d, $^2J_{\text{CP}}$ = 5.5 Hz, CHN), 60.5 (s, CH <sub>COOD</sub> ), 37.9 (d, $^2J_{\text{CP}}$ = 4.6 Hz, CH <sub>2</sub> COOD), 37.3 (d, $^1J_{\text{CP}}$ = 16.4 Hz, C <sub>flu</sub> ), 35.5 (d, $^1J_{\text{CP}}$ = 19.3 Hz, C <sub>flu</sub> ), 34.7 (s, C <sub>flu</sub> O <sub>2</sub> ), 34.3 (s, CH <sub>2</sub> COOD), 30.1 (d, $^2J_{\text{CP}}$ = 4.6 Hz, CH <sub>3</sub> tBu), 29.8 (d, $^2J_{\text{CP}}$ = 3.7 Hz, CH <sub>3</sub> tBu), 29.3 (s, CH <sub>3</sub> tBu O <sub>2</sub> ), 28.5 (s, CH <sub>2</sub> COOD), 26.4 (d, $^1J_{\text{CP}}$ = 24.8 Hz, CH <sub>2</sub> P), 25.0 (d, $^2J_{\text{CP}}$ = 2.8 Hz, CH <sub>2</sub> COOD). |                                                                                                                                                                                     |                               |                               |                                                                                                                                                                                                                                                                                                                                                                                     |      |                                                                                 |                                  |
| <b><math>^{31}\text{P}\{^1\text{H}\}</math> NMR (CDCl<sub>3</sub>, 202 MHz, 298 K)</b> $\delta$ (ppm) = 43.1 (s).                                                                                                                                                                                                                                                                                                                                                                                                                                                                                                                                                                                                                                                                                                                                                                                                                                                                                                                                                                                                                                                                                                                                             |                                                                                                                                                                                     |                               |                               | <b>IR spectrum (neat)</b> $\nu$ (cm <sup>-1</sup> ) = 2967, 2886, 1607, 1594, 1480, 1353, 1270, 1162, 1120, 974, 898, 887, 839, 744, 716, 681, 668.                                                                                                                                                                                                                                 |      |                                                                                 |                                  |
| <b>HRMS (method: ESI+)</b><br>calculated for C <sub>24</sub> H <sub>44</sub> IrNOP [M-BArF] <sup>+</sup> : 586.2784,<br>found: 586.2726.                                                                                                                                                                                                                                                                                                                                                                                                                                                                                                                                                                                                                                                                                                                                                                                                                                                                                                                                                                                                                                                                                                                      |                                                                                                                                                                                     |                               |                               | <b>relevant literature references:</b> S. Nanchen, A. Pfaltz <i>Chem. Eur. J.</i> <b>2006</b> , <i>12</i> , 4550-4558; M. Diéguez, O. Pàmies <i>Chem. Eur. J.</i> <b>2008</b> , <i>14</i> , 3653-3669; D.-R. Hou, K. Burgess <i>Org. Lett.</i> <b>1999</b> , <i>1</i> , 1745-1747; D.-R. Hou, J. H. Reibenspies, K. Burgess <i>J. Org. Chem.</i> <b>2001</b> , <i>66</i> , 206-215. |      |                                                                                 |                                  |
| Separation Conditions                                                                                                                                                                                                                                                                                                                                                                                                                                                                                                                                                                                                                                                                                                                                                                                                                                                                                                                                                                                                                                                                                                                                                                                                                                         |                                                                                                                                                                                     |                               |                               |                                                                                                                                                                                                                                                                                                                                                                                     |      |                                                                                 |                                  |
| <b>HPLC (column, <math>\lambda_1</math>, <math>\lambda_2</math>, eluent, flow rate, retention time):</b>                                                                                                                                                                                                                                                                                                                                                                                                                                                                                                                                                                                                                                                                                                                                                                                                                                                                                                                                                                                                                                                                                                                                                      |                                                                                                                                                                                     |                               |                               | <b>GC (column, method or sequence, retention time):</b>                                                                                                                                                                                                                                                                                                                             |      |                                                                                 |                                  |

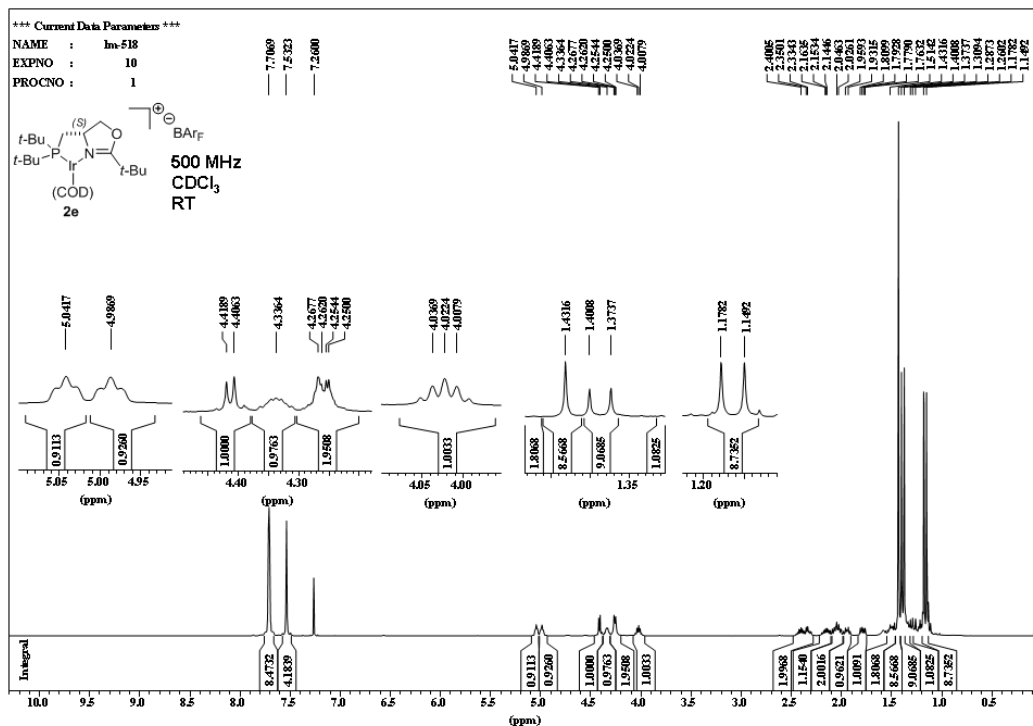

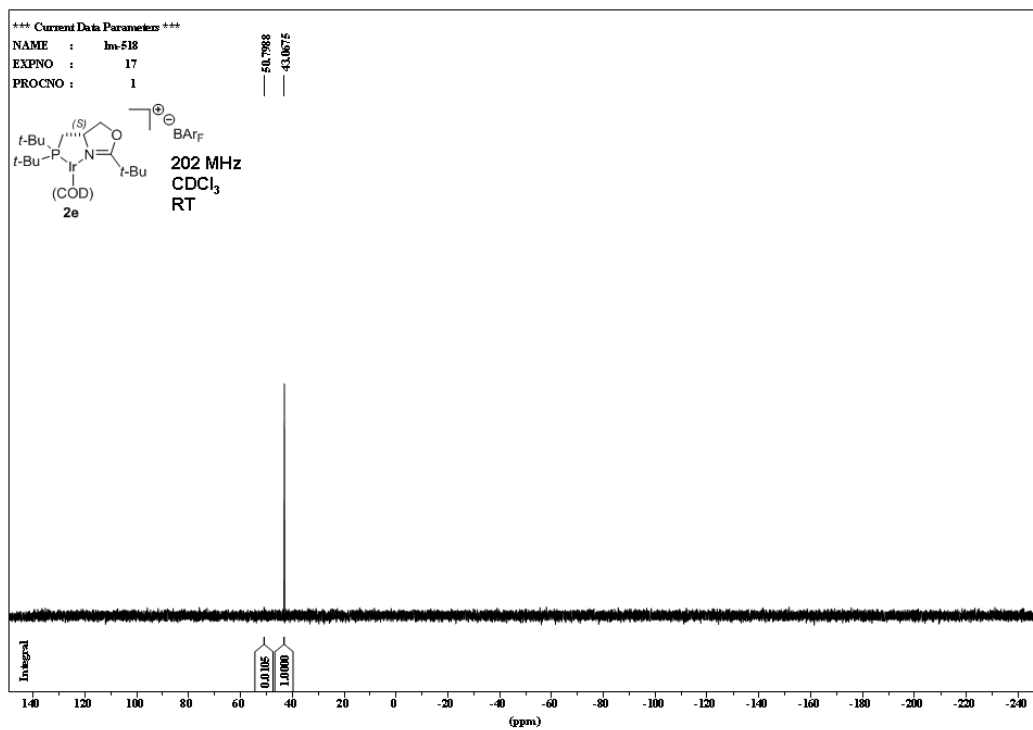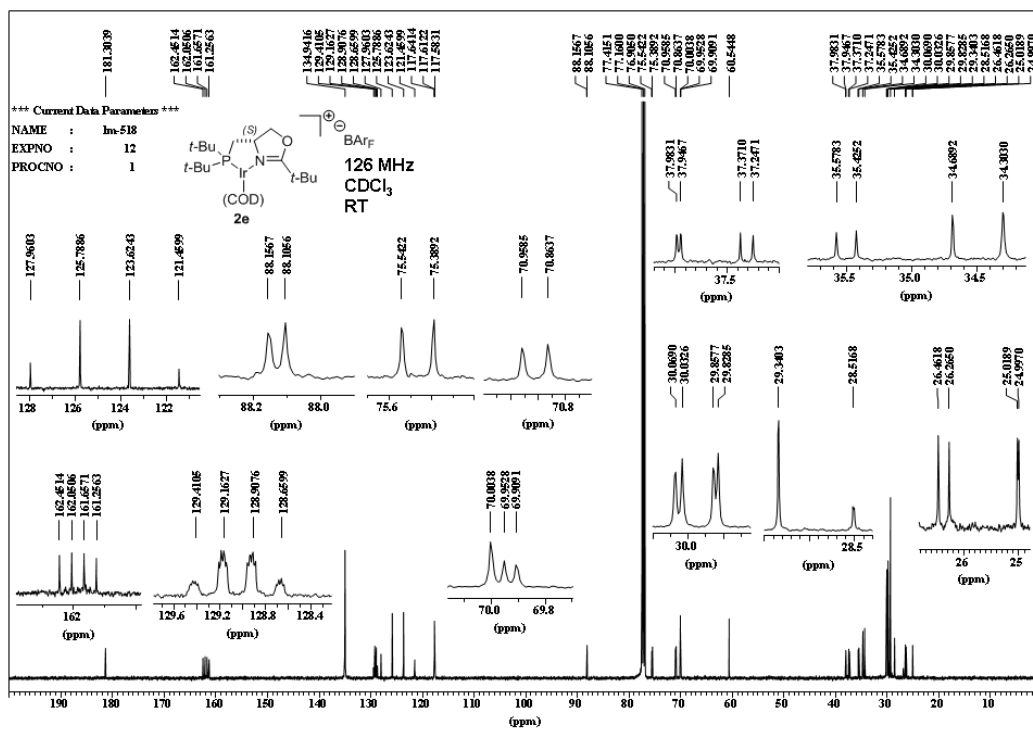

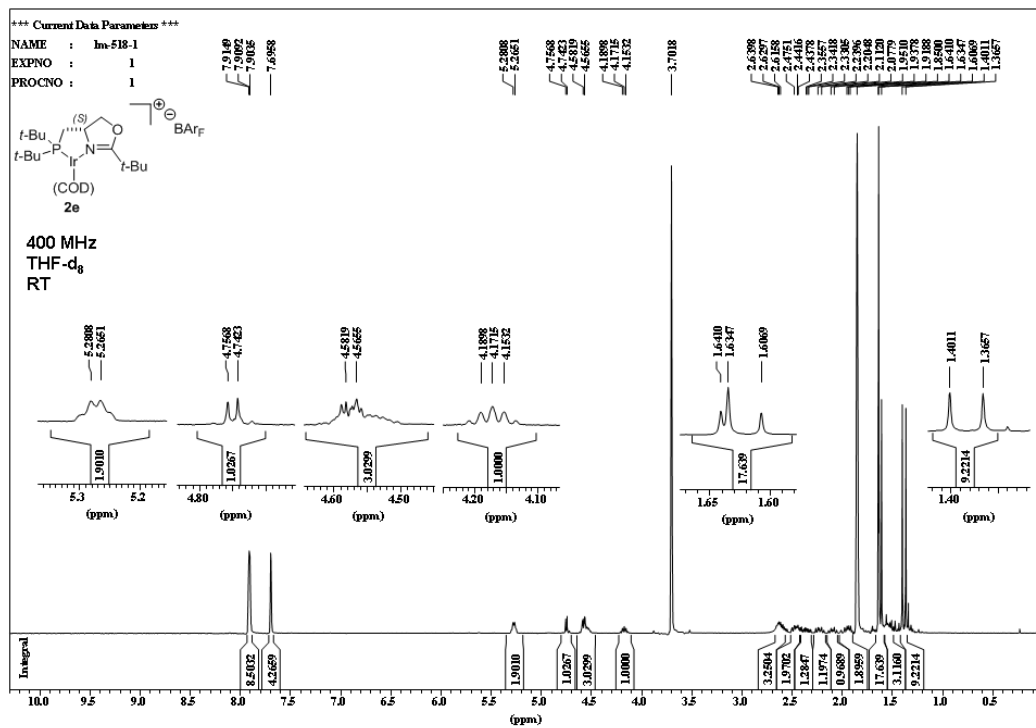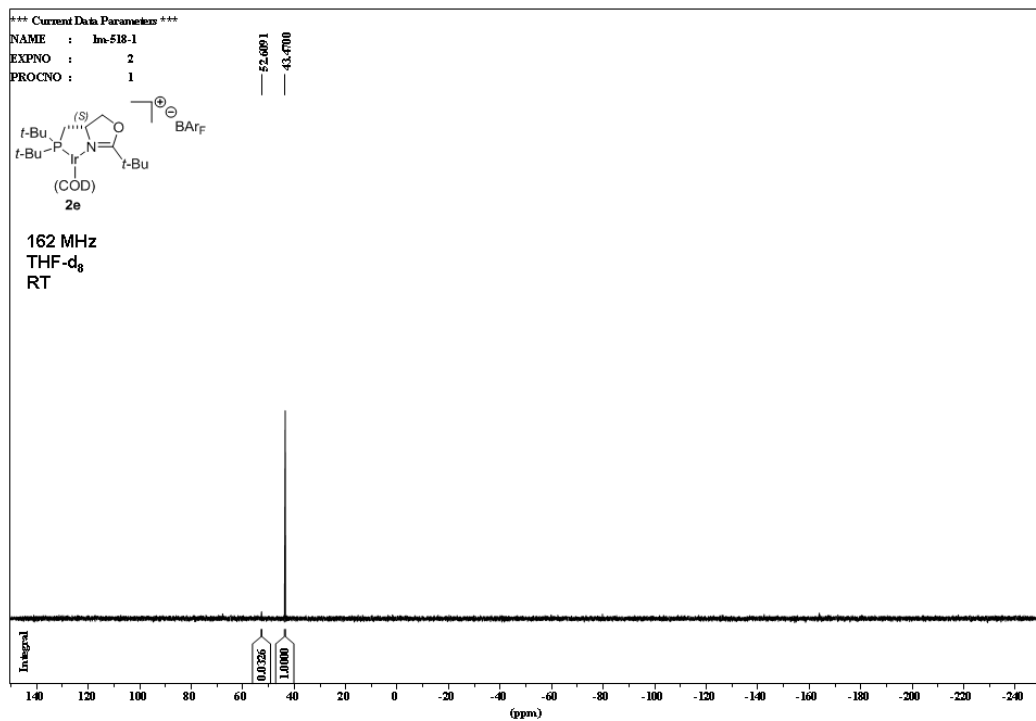

| Structure                                                                                                                                                                                                                                                                                                                                                                                                                                                                                                                                                                                                                                                                                                                                                                                                                                                                                                                                                                                                                                                                                                                                                                                                                                                                                                                                                                     | $^1\text{H}$                                                                                                                                                                 | $^{13}\text{C}\{^1\text{H}\}$ | $^{31}\text{P}\{^1\text{H}\}$ | IR                                                                                                                                                                                                                                                                                                                                                                           | HRMS | $[\alpha]_D$ | MAZET GROUP DATA FORM |  |
|-------------------------------------------------------------------------------------------------------------------------------------------------------------------------------------------------------------------------------------------------------------------------------------------------------------------------------------------------------------------------------------------------------------------------------------------------------------------------------------------------------------------------------------------------------------------------------------------------------------------------------------------------------------------------------------------------------------------------------------------------------------------------------------------------------------------------------------------------------------------------------------------------------------------------------------------------------------------------------------------------------------------------------------------------------------------------------------------------------------------------------------------------------------------------------------------------------------------------------------------------------------------------------------------------------------------------------------------------------------------------------|------------------------------------------------------------------------------------------------------------------------------------------------------------------------------|-------------------------------|-------------------------------|------------------------------------------------------------------------------------------------------------------------------------------------------------------------------------------------------------------------------------------------------------------------------------------------------------------------------------------------------------------------------|------|--------------|-----------------------|--|
|                                                                                                                                                                                                                                                                                                                                                                                                                                                                                                                                                                                                                                                                                                                                                                                                                                                                                                                                                                                                                                                                                                                                                                                                                                                                                              | Name (S)-4-[(di-1-adamantylphosphanyl)methyl]-2-(tert-butyl)-4,5-dihydrooxazoline-η¹-(1,5-cyclooctadiene) iridium(I) tetrakis-[3,5-bis(trifluoromethyl)phenyl]borate. LM-522 |                               |                               |                                                                                                                                                                                                                                                                                                                                                                              |      |              |                       |  |
|                                                                                                                                                                                                                                                                                                                                                                                                                                                                                                                                                                                                                                                                                                                                                                                                                                                                                                                                                                                                                                                                                                                                                                                                                                                                                                                                                                               | Properties orange solid                                                                                                                                                      |                               |                               | Formula C <sub>68</sub> H <sub>68</sub> BF <sub>24</sub> IrNOP                                                                                                                                                                                                                                                                                                               |      |              |                       |  |
| Molecular Weight 1605.24                                                                                                                                                                                                                                                                                                                                                                                                                                                                                                                                                                                                                                                                                                                                                                                                                                                                                                                                                                                                                                                                                                                                                                                                                                                                                                                                                      | tlc conditions: SiO <sub>2</sub> , CH <sub>2</sub> Cl <sub>2</sub><br>R <sub>f</sub> = 0.89 (UV)                                                                             |                               |                               | $[\alpha]_D^{26} = +41.1$<br>c 1.0, in CH <sub>2</sub> Cl <sub>2</sub> .                                                                                                                                                                                                                                                                                                     |      | Mp = 87-88°C |                       |  |
| $^1\text{H}$ NMR (CDCl <sub>3</sub> , 500 MHz, 298 K) δ(ppm) = 7.72 (s, 8H, H <sub>OBAF</sub> ), 7.54 (s, 4H, H <sub>PBAF</sub> ), 5.20 (m, 1H, CH <sub>COD</sub> ), 4.88 (m, 1H, CH <sub>COD</sub> ), 4.59 (m, 1H, CH <sub>COD</sub> ), 4.43 (m, 1H, CHO), 4.24 (m, 1H, CHO, 1H, CHN), 3.85 (m, 1H, CH <sub>COD</sub> ), 2.35-1.24 (m, 30H, H <sub>Ad</sub> , 8H, CH <sub>2</sub> COD, 2H, CH <sub>2</sub> P), 1.44 (s, 9H, CH <sub>3</sub> tBu OX).                                                                                                                                                                                                                                                                                                                                                                                                                                                                                                                                                                                                                                                                                                                                                                                                                                                                                                                         |                                                                                                                                                                              |                               |                               |                                                                                                                                                                                                                                                                                                                                                                              |      |              |                       |  |
| $^{13}\text{C}\{^1\text{H}\}$ NMR (CDCl <sub>3</sub> , 126 MHz, 298 K) δ(ppm) = 180.9 (s, CN), 161.9 (q, $^1J_{\text{CB}} = 49.9$ Hz, C <sub>PBAF</sub> ), 135.0 (s, C <sub>OBAF</sub> ), 129.0 (q, $^2J_{\text{CF}} = 31.2$ Hz, CCF <sub>3</sub> ), 124.7 (q, $^1J_{\text{CF}} = 273.3$ Hz, CF <sub>3</sub> ), 117.6 (s, C <sub>PBAF</sub> ), 85.9 (d, $^2J_{\text{CP}} = 4.6$ Hz, CH <sub>COD</sub> ), 73.1 (d, $^2J_{\text{CP}} = 19.3$ Hz, CH <sub>COD</sub> ), 71.4 (s, CH <sub>COD</sub> ), 71.0 (d, $^3J_{\text{CP}} = 11.9$ Hz, CH <sub>2</sub> O), 70.3 (d, $^2J_{\text{CP}} = 6.4$ Hz, CHN), 60.0 (s, CH <sub>COD</sub> ), 42.7 (d, $^1J_{\text{CP}} = 12.9$ Hz, C <sub>AdP</sub> ), 42.0 (d, $^1J_{\text{CP}} = 15.6$ Hz, C <sub>AdP</sub> ), 41.7 (s, CH <sub>2</sub> C <sub>Ad</sub> ), 40.3 (s, CH <sub>2</sub> C <sub>Ad</sub> ), 38.1 (d, $^3J_{\text{CP}} = 4.6$ Hz, CH <sub>2</sub> COD), 36.3 (s, CH <sub>2</sub> CH <sub>Ad</sub> ), 36.2 (s, CH <sub>2</sub> CH <sub>Ad</sub> ), 34.8 (s, C <sub>tBu</sub> OX), 34.6 (s, CH <sub>2</sub> COD), 29.3 (s, CH <sub>3</sub> tBu OX), 28.5 (s, CH <sub>2</sub> COD), 28.4 (d, $^3J_{\text{CP}} = 8.3$ Hz, CHC <sub>Ad</sub> ), 28.3 (d, $^3J_{\text{CP}} = 8.3$ Hz, CHC <sub>Ad</sub> ), 25.0 (d, $^2J_{\text{CP}} = 2.8$ Hz, CH <sub>2</sub> COD), 22.2 (d, $^1J_{\text{CP}} = 24.8$ Hz, CH <sub>2</sub> P). |                                                                                                                                                                              |                               |                               |                                                                                                                                                                                                                                                                                                                                                                              |      |              |                       |  |
| $^{31}\text{P}\{^1\text{H}\}$ NMR (CDCl <sub>3</sub> , 202 MHz, 298 K) δ(ppm) = 35.0 (s).                                                                                                                                                                                                                                                                                                                                                                                                                                                                                                                                                                                                                                                                                                                                                                                                                                                                                                                                                                                                                                                                                                                                                                                                                                                                                     |                                                                                                                                                                              |                               |                               | IR spectrum (neat) ν (cm <sup>-1</sup> ) = 2911, 2856, 1608, 1593, 1481, 1452, 1353, 1273, 1158, 1117, 973, 934, 886, 839, 745, 712, 682, 669.                                                                                                                                                                                                                               |      |              |                       |  |
| HRMS (method: ESI+ )<br>calculated for C <sub>36</sub> H <sub>56</sub> IrNOP [M-BAF] <sup>+</sup> : 742.3723, found 742.3750.                                                                                                                                                                                                                                                                                                                                                                                                                                                                                                                                                                                                                                                                                                                                                                                                                                                                                                                                                                                                                                                                                                                                                                                                                                                 |                                                                                                                                                                              |                               |                               | relevant literature references: S. Nanchen, A. Pfaltz <i>Chem. Eur. J.</i> <b>2006</b> , <i>12</i> , 4550-4558; M. Diéguez, O. Pàmies <i>Chem. Eur. J.</i> <b>2008</b> , <i>14</i> , 3653-3669; D.-R. Hou, K. Burgess <i>Org. Lett.</i> <b>1999</b> , <i>1</i> , 1745-1747; D.-R. Hou, J. H. Reibenspies, K. Burgess <i>J. Org. Chem.</i> <b>2001</b> , <i>66</i> , 206-215. |      |              |                       |  |
| Separation Conditions                                                                                                                                                                                                                                                                                                                                                                                                                                                                                                                                                                                                                                                                                                                                                                                                                                                                                                                                                                                                                                                                                                                                                                                                                                                                                                                                                         |                                                                                                                                                                              |                               |                               |                                                                                                                                                                                                                                                                                                                                                                              |      |              |                       |  |
| HPLC (column, λ <sub>1</sub> , λ <sub>2</sub> , eluent, flow rate, retention time):                                                                                                                                                                                                                                                                                                                                                                                                                                                                                                                                                                                                                                                                                                                                                                                                                                                                                                                                                                                                                                                                                                                                                                                                                                                                                           |                                                                                                                                                                              |                               |                               | GC (column, method or sequence, retention time):                                                                                                                                                                                                                                                                                                                             |      |              |                       |  |

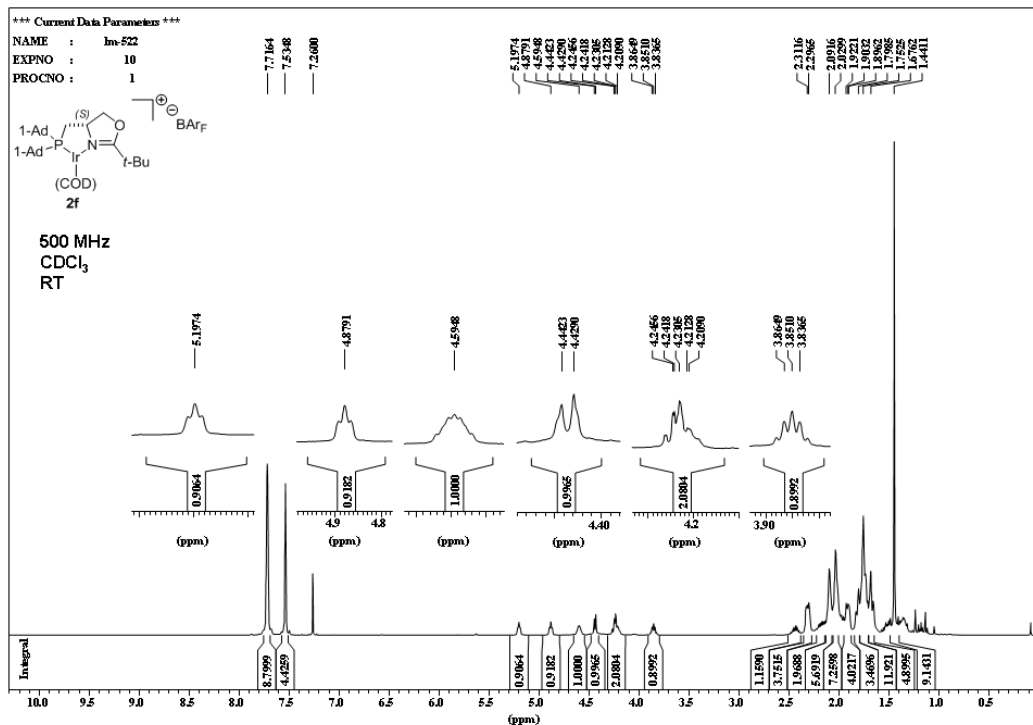

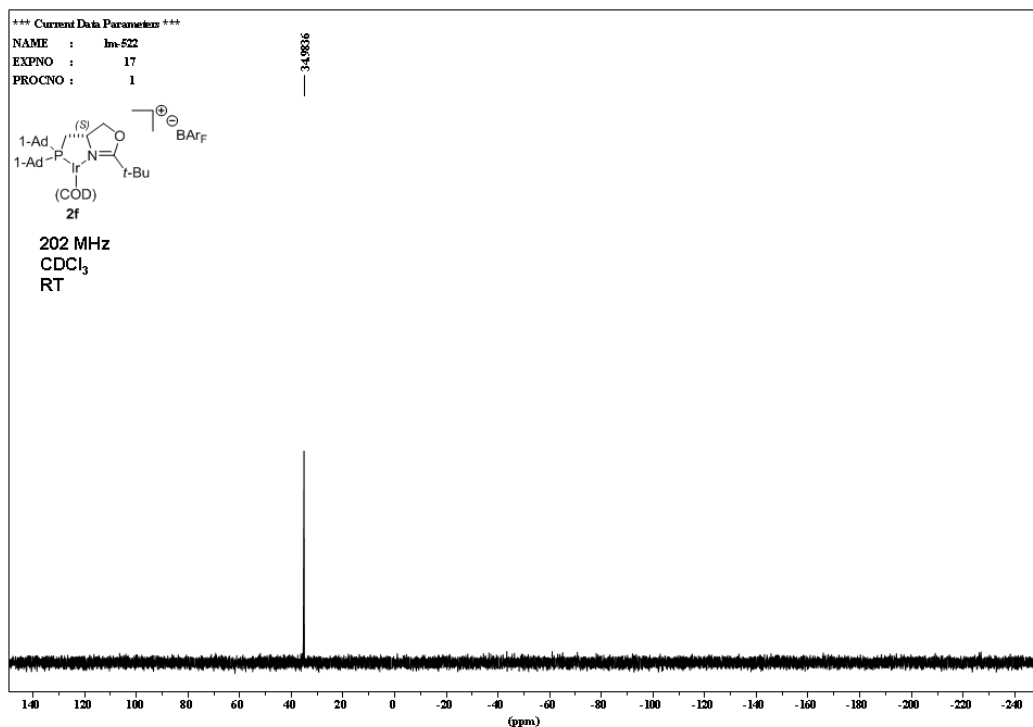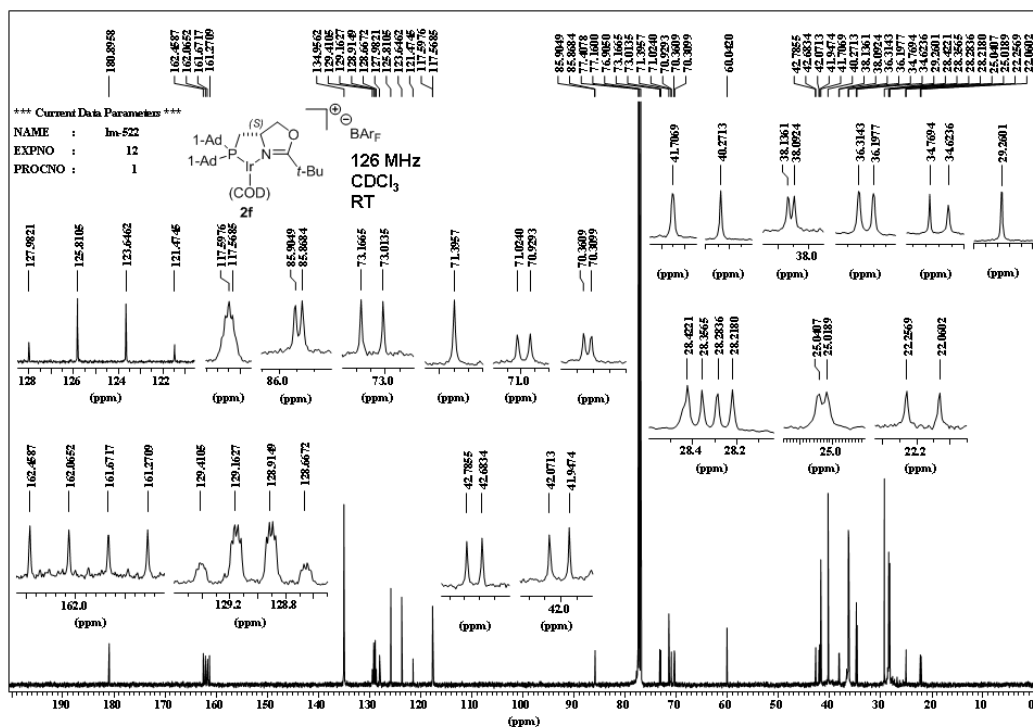



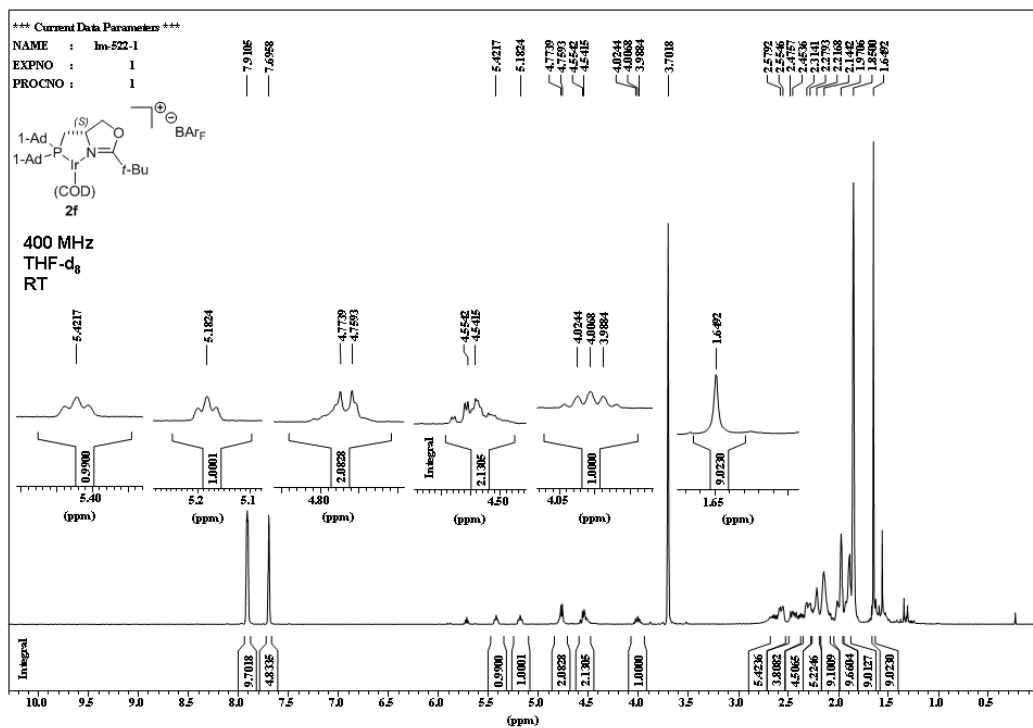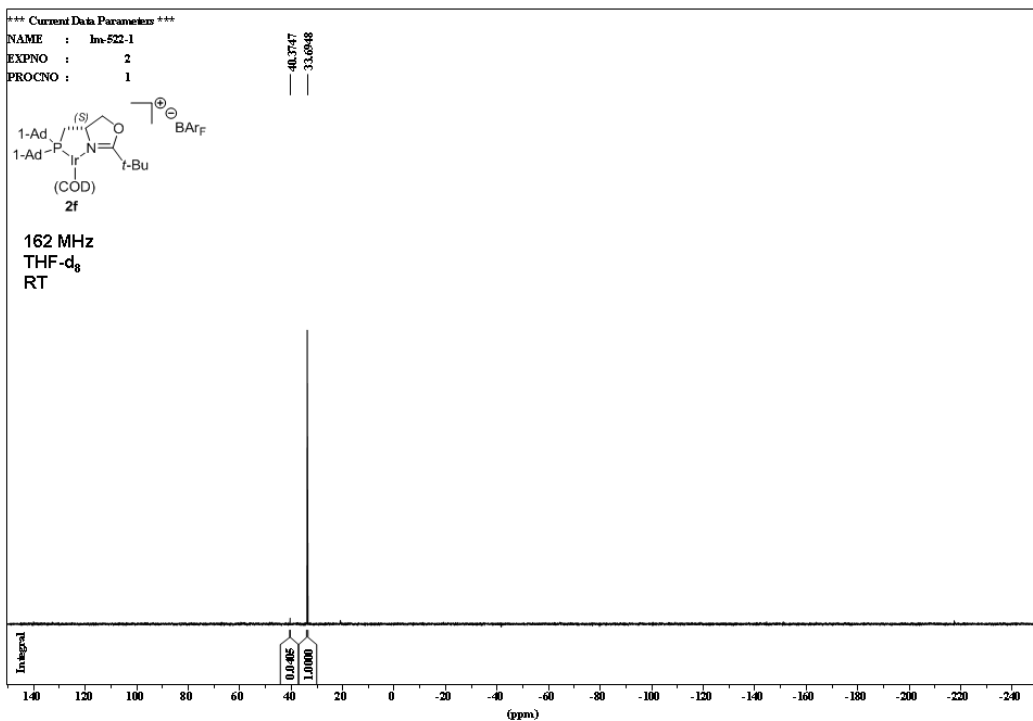

| Structure                                                                                                                                                                                                                                                                                                                                                                                                                                                                                                                                | $^1\text{H}$                                                                                          | $^{13}\text{C}\{^1\text{H}\}$ | IR                                                                                                                                                                   | LRMS                                                          | MAZET GROUP DATA FORM |
|------------------------------------------------------------------------------------------------------------------------------------------------------------------------------------------------------------------------------------------------------------------------------------------------------------------------------------------------------------------------------------------------------------------------------------------------------------------------------------------------------------------------------------------|-------------------------------------------------------------------------------------------------------|-------------------------------|----------------------------------------------------------------------------------------------------------------------------------------------------------------------|---------------------------------------------------------------|-----------------------|
| 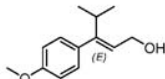                                                                                                                                                                                                                                                                                                                                                                                                                                                        | <b>Name</b> ( <i>E</i> )-3-(4-methoxyphenyl)-4-methylpent-2-en-1-ol.<br>LM-345                        |                               |                                                                                                                                                                      |                                                               |                       |
|                                                                                                                                                                                                                                                                                                                                                                                                                                                                                                                                          | <b>Properties</b> colourless oil                                                                      |                               |                                                                                                                                                                      | <b>Formula</b> C <sub>13</sub> H <sub>18</sub> O <sub>2</sub> |                       |
| <b>Molecular Weight</b> 206.28                                                                                                                                                                                                                                                                                                                                                                                                                                                                                                           | tlc conditions: SiO <sub>2</sub> , Pent / Et <sub>2</sub> O = 1:1<br><i>R<sub>f</sub></i> = 0.32 (UV) |                               |                                                                                                                                                                      |                                                               |                       |
| $^1\text{H}$ NMR (CDCl <sub>3</sub> , 400 MHz, 298 K) $\delta$ (ppm) = 7.11 (d, $^3J_{\text{HH}}$ = 8.7 Hz, 2H, H <sub>oAr</sub> ), 6.83 (d, $^3J_{\text{HH}}$ = 8.7 Hz, 2H, H <sub>mAr</sub> ), 5.46 (t, $^3J_{\text{HH}}$ = 6.7 Hz, 1H, CHCH <sub>2</sub> ), 4.34 (dd, $^3J_{\text{HH}}$ = 6.4 Hz, $^2J_{\text{HH}}$ = 5.3 Hz, 2H, CH <sub>2</sub> OH), 3.80 (s, OCH <sub>3</sub> ), 3.01 (hept, $^3J_{\text{HH}}$ = 7.0 Hz, 1H, CH <sub>IPr</sub> ), 1.52 (bs, 1H, OH), 1.05 (d, $^3J_{\text{HH}}$ = 7.0 Hz, 6H, CH <sub>3Pr</sub> ). |                                                                                                       |                               |                                                                                                                                                                      |                                                               |                       |
| $^{13}\text{C}\{^1\text{H}\}$ NMR (CDCl <sub>3</sub> , 101 MHz, 298 K) $\delta$ (ppm) = 158.5 (s, C <sub>pAr</sub> ), 149.6 (CCH <sub>IPr</sub> ), 134.8 (s, C <sub>ipsoAr</sub> ), 129.5 (s, C <sub>oAr</sub> ), 127.2 (CHCH <sub>2</sub> ), 113.1 (s, C <sub>mAr</sub> ), 59.1 (CH <sub>2</sub> OH), 55.3 (s, OCH <sub>3</sub> ), 29.9 (s, CH <sub>IPr</sub> ), 22.1 (s, CH <sub>3Pr</sub> ).                                                                                                                                          |                                                                                                       |                               |                                                                                                                                                                      |                                                               |                       |
|                                                                                                                                                                                                                                                                                                                                                                                                                                                                                                                                          |                                                                                                       |                               | <b>IR spectrum (neat)</b> $\nu$ (cm <sup>-1</sup> ) = 3341, 2961, 2932, 2871, 2836, 1608, 1508, 1463, 1442, 1362, 1284, 1242, 1177, 1107, 1085, 1033, 828, 792, 733. |                                                               |                       |
| <b>LRMS</b> (method: ESI)<br>calculated for C <sub>13</sub> H <sub>17</sub> O [M-OH] <sup>+</sup> : 189.3,<br>found 189.4.                                                                                                                                                                                                                                                                                                                                                                                                               |                                                                                                       |                               | <b>relevant literature references:</b> L. Mantilli, D. Gérard, S. Torche, C. Besnard, C. Mazet <i>Angew. Chem. Int. Ed.</i> <b>2009</b> , <i>48</i> , 5143–5147.     |                                                               |                       |
| Separation Conditions                                                                                                                                                                                                                                                                                                                                                                                                                                                                                                                    |                                                                                                       |                               |                                                                                                                                                                      |                                                               |                       |
| <b>HPLC</b> (column, $\lambda_1$ , $\lambda_2$ , eluent, flow rate, retention time):                                                                                                                                                                                                                                                                                                                                                                                                                                                     |                                                                                                       |                               | <b>GC</b> (column, method or sequence, retention time):                                                                                                              |                                                               |                       |

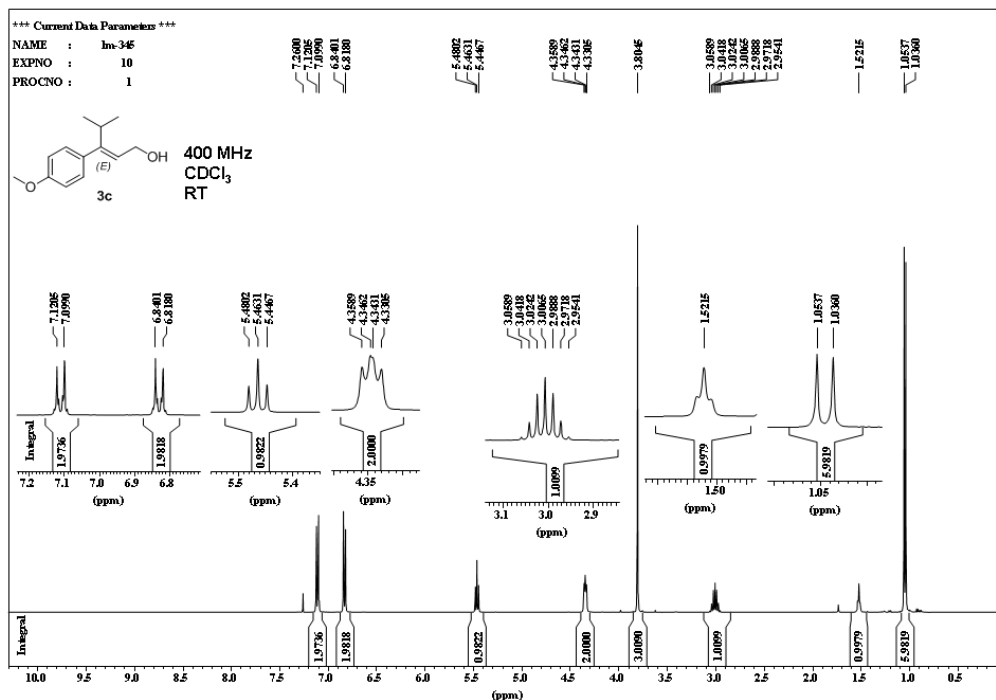

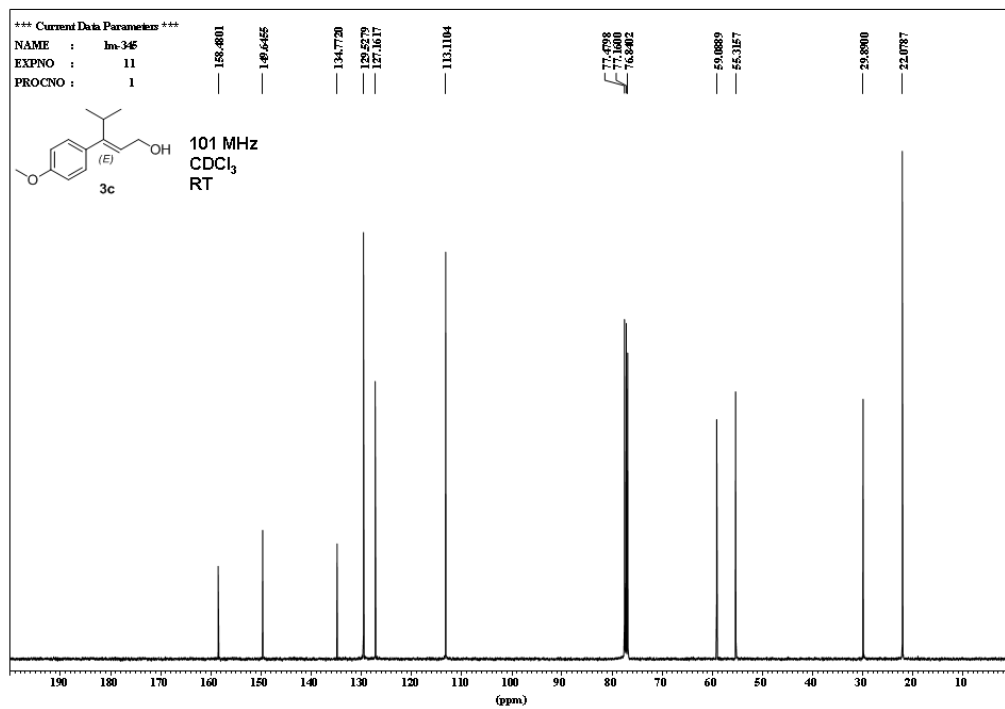

| Structure                                                                                                                                                                                                                                                                                                                                                                                                                                                                          | $^1\text{H}$                                                                                          | $^{13}\text{C}\{^1\text{H}\}$ | IR                                                                                                                                                                                                                                                                                                                                | LRMS | MAZET GROUP DATA FORM                                         |
|------------------------------------------------------------------------------------------------------------------------------------------------------------------------------------------------------------------------------------------------------------------------------------------------------------------------------------------------------------------------------------------------------------------------------------------------------------------------------------|-------------------------------------------------------------------------------------------------------|-------------------------------|-----------------------------------------------------------------------------------------------------------------------------------------------------------------------------------------------------------------------------------------------------------------------------------------------------------------------------------|------|---------------------------------------------------------------|
| 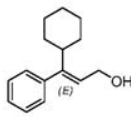                                                                                                                                                                                                                                                                                                                                                                                                  | <b>Name</b> ( <i>E</i> )-3-cyclohexyl-3-phenylprop-2-en-1-ol<br>LM-317                                |                               |                                                                                                                                                                                                                                                                                                                                   |      | <b>Formula</b> C <sub>13</sub> H <sub>18</sub> O <sub>2</sub> |
|                                                                                                                                                                                                                                                                                                                                                                                                                                                                                    | <b>Properties</b> colourless oil                                                                      |                               |                                                                                                                                                                                                                                                                                                                                   |      |                                                               |
| <b>Molecular Weight</b> 216.32                                                                                                                                                                                                                                                                                                                                                                                                                                                     | tlc conditions: SiO <sub>2</sub> , Pent / Et <sub>2</sub> O = 2:1<br><i>R<sub>f</sub></i> = 0.21 (UV) |                               |                                                                                                                                                                                                                                                                                                                                   |      |                                                               |
| $^1\text{H}$ NMR (CDCl <sub>3</sub> , 400 MHz, 298 K) $\delta$ (ppm) = 7.33-7.26 (m, 3H, H <sub>ar,Ph</sub> ), 7.19-7.17 (m, 2H, H <sub>ar,Ph</sub> ), 5.49 (t, $^3J_{\text{HH}}$ = 6.7 Hz, 1H, CHCH <sub>2</sub> ), 4.38 (d, $^3J_{\text{HH}}$ = 6.6 Hz, 2H, CH <sub>2</sub> OH), 2.64 (m, 1H, CH <sub>2</sub> ), 1.95 (m, 1H, H <sub>2C</sub> ), 1.74 (m, 2H, H <sub>2C</sub> ), 1.67 (m, 2H, H <sub>2C</sub> ), 1.30 (m, 4H, H <sub>2C</sub> ), 1.08 (m, 1H, H <sub>2C</sub> ). |                                                                                                       |                               |                                                                                                                                                                                                                                                                                                                                   |      |                                                               |
| $^{13}\text{C}\{^1\text{H}\}$ NMR (CDCl <sub>3</sub> , 101 MHz, 298 K) $\delta$ (ppm) = 149.5 (CCH <sub>2</sub> ), 143.0 (C <sub>ipso,Ph</sub> ), 128.4 (s, C <sub>ar,Ph</sub> ), 127.6 (CHCH <sub>2</sub> ), 127.6 (s, C <sub>ar,Ph</sub> ), 126.6 (s, C <sub>ar,Ph</sub> ), 58.9 (CH <sub>2</sub> OH), 32.2 (s, CH <sub>2</sub> C <sub>2</sub> ), 26.7 (s, CH <sub>2</sub> C <sub>2</sub> ), 26.0 (s, CH <sub>2</sub> C <sub>2</sub> ).                                          |                                                                                                       |                               |                                                                                                                                                                                                                                                                                                                                   |      |                                                               |
|                                                                                                                                                                                                                                                                                                                                                                                                                                                                                    |                                                                                                       |                               | <b>IR spectrum (neat)</b> $\nu$ (cm <sup>-1</sup> ) = 3310, 3054, 2925, 2852, 1599, 1490, 1448, 1264, 1109, 1073, 1050, 1008, 949, 891, 845, 765, 737, 700.                                                                                                                                                                       |      |                                                               |
| <b>LRMS</b> (method: ESI)<br>calculated for C <sub>13</sub> H <sub>19</sub> [M-OH] <sup>+</sup> : 199.3,<br>found 199.1.                                                                                                                                                                                                                                                                                                                                                           |                                                                                                       |                               | <b>relevant literature references:</b> L. Mantilli, D. Gérard, S. Torche, C. Besnard, C. Mazet <i>Angew. Chem. Int. Ed.</i> <b>2009</b> , <i>48</i> , 5143–5147; G. Pinna, G. Cignarella, G. Loriga, G. Morinieddu, J.-M. Mussinu, S. Ruiu, P. Fadda and W. Fratta <i>Bioorg. Med. Chem.</i> <b>1967</b> , <i>32</i> , 1929–1937. |      |                                                               |
| Separation Conditions                                                                                                                                                                                                                                                                                                                                                                                                                                                              |                                                                                                       |                               |                                                                                                                                                                                                                                                                                                                                   |      |                                                               |
| <b>HPLC</b> (column, $\lambda_1$ , $\lambda_2$ , eluent, flow rate, retention time):                                                                                                                                                                                                                                                                                                                                                                                               |                                                                                                       |                               | <b>GC</b> (column, method or sequence, retention time):                                                                                                                                                                                                                                                                           |      |                                                               |

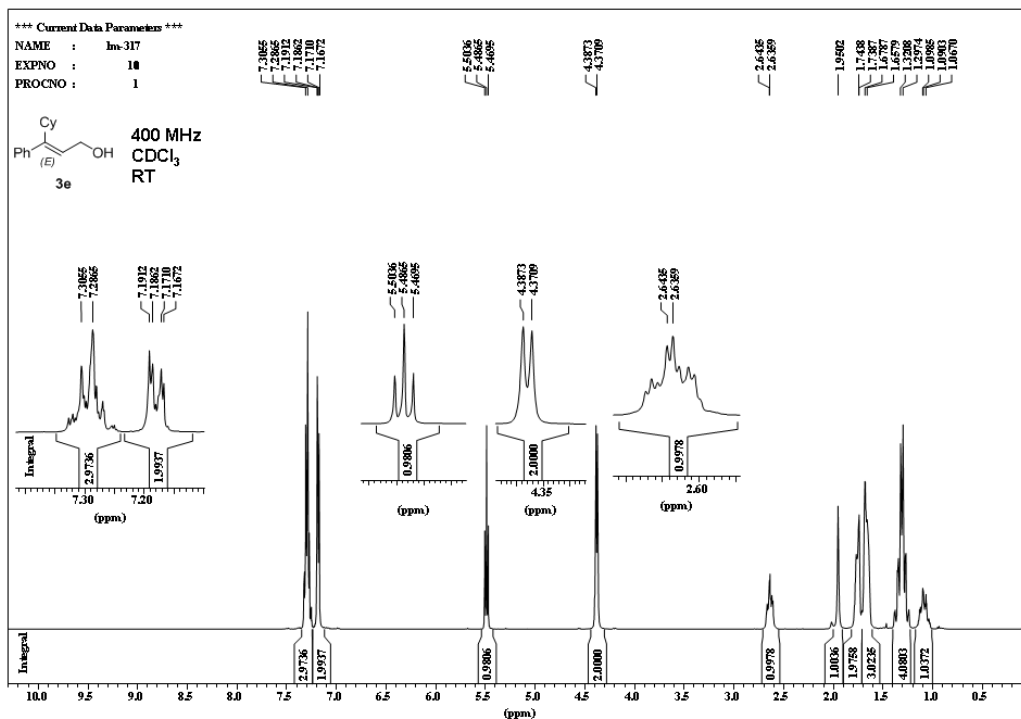

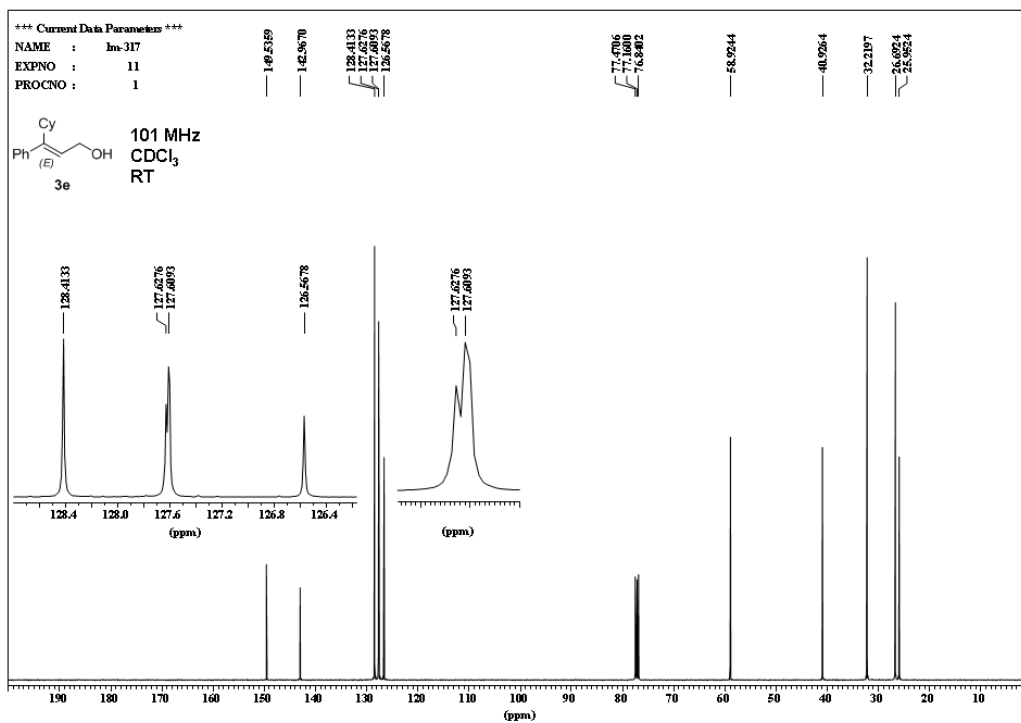

| Structure                                                                                                                                                                                                                                                                                                                                                                                                                                                                                         | <sup>1</sup> H                                                   | <sup>13</sup> C{ <sup>1</sup> H} | IR                                                                                                                                                  | HRMS                                            | MAZET GROUP DATA FORM |  |
|---------------------------------------------------------------------------------------------------------------------------------------------------------------------------------------------------------------------------------------------------------------------------------------------------------------------------------------------------------------------------------------------------------------------------------------------------------------------------------------------------|------------------------------------------------------------------|----------------------------------|-----------------------------------------------------------------------------------------------------------------------------------------------------|-------------------------------------------------|-----------------------|--|
| 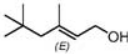                                                                                                                                                                                                                                                                                                                                                                                                                 | <b>Name</b> ( <i>E</i> )-3,5,5-trimethylhex-2-en-1-ol.<br>LM-455 |                                  |                                                                                                                                                     |                                                 |                       |  |
|                                                                                                                                                                                                                                                                                                                                                                                                                                                                                                   | <b>Properties</b> colourless oil                                 |                                  |                                                                                                                                                     | <b>Formula</b> C <sub>9</sub> H <sub>18</sub> O |                       |  |
|                                                                                                                                                                                                                                                                                                                                                                                                                                                                                                   | <b>Molecular Weight</b> 142.24                                   |                                  | <i>tlc conditions</i> : SiO <sub>2</sub> , Pent / Et <sub>2</sub> O = 5:2<br><i>R<sub>f</sub></i> = 0.30 (UV)                                       |                                                 |                       |  |
| <b><sup>1</sup>H NMR (CDCl<sub>3</sub>, 500 MHz, 298 K)</b> δ(ppm) = 5.34 ( <i>ap.t</i> , <sup>3</sup> <i>J</i> <sub>HH</sub> = 6.6 Hz, <sup>4</sup> <i>J</i> <sub>HH</sub> = 0.7 Hz, 1H, CHCH <sub>2</sub> ), 4.14 (d, <sup>3</sup> <i>J</i> <sub>HH</sub> = 6.6 Hz, 2H, CH <sub>2</sub> OH), 1.92 (s, 2H, CH <sub>2</sub> C <sub>quat</sub> ), 1.70 ( <i>ap.t</i> , <sup>4</sup> <i>J</i> <sub>HH</sub> = 0.7 Hz, 3H, CCH <sub>3</sub> ), 1.54 (bs, 1H, OH), 0.89 (s, 9H, CH <sub>3</sub> tBu). |                                                                  |                                  |                                                                                                                                                     |                                                 |                       |  |
| <b><sup>13</sup>C NMR (CDCl<sub>3</sub>, 126 MHz, 298 K)</b> δ (ppm) = 137.7 (CCH <sub>3</sub> ), 127.4 (CHCH <sub>2</sub> ), 59.6 (CH <sub>2</sub> OH), 53.5 (CH <sub>2</sub> C <sub>quat</sub> ), 31.8 (CCH <sub>3</sub> tBu), 30.2 (CH <sub>3</sub> tBu), 19.1 (CH <sub>3</sub> ).                                                                                                                                                                                                             |                                                                  |                                  |                                                                                                                                                     |                                                 |                       |  |
|                                                                                                                                                                                                                                                                                                                                                                                                                                                                                                   |                                                                  |                                  | <b>IR spectrum (neat)</b> ν (cm <sup>-1</sup> ) = 3327, 2951, 2908, 2867, 1661, 1476, 1466, 1391, 1364, 1236, 1199, 1093, 1038, 995, 892, 792, 733. |                                                 |                       |  |
| <b>LRMS</b> ( <i>method</i> : EI)<br><b>calculated for</b> . C <sub>8</sub> H <sub>16</sub> O [M-CH <sub>2</sub> ]: 128.1,<br><b>found</b> 128.0.                                                                                                                                                                                                                                                                                                                                                 |                                                                  |                                  | <b>relevant literature references</b> : S. Bywater, P. Lachance, P. Black<br><i>J. Organomet. Chem.</i> <b>1985</b> , 280, 159-164 (only IR).       |                                                 |                       |  |
| Separation Conditions                                                                                                                                                                                                                                                                                                                                                                                                                                                                             |                                                                  |                                  |                                                                                                                                                     |                                                 |                       |  |
| <b>HPLC</b> (column, λ <sub>1</sub> , λ <sub>2</sub> , eluent, flow rate, retention time):                                                                                                                                                                                                                                                                                                                                                                                                        |                                                                  |                                  | <b>GC</b> (column, method or sequence, retention time):                                                                                             |                                                 |                       |  |

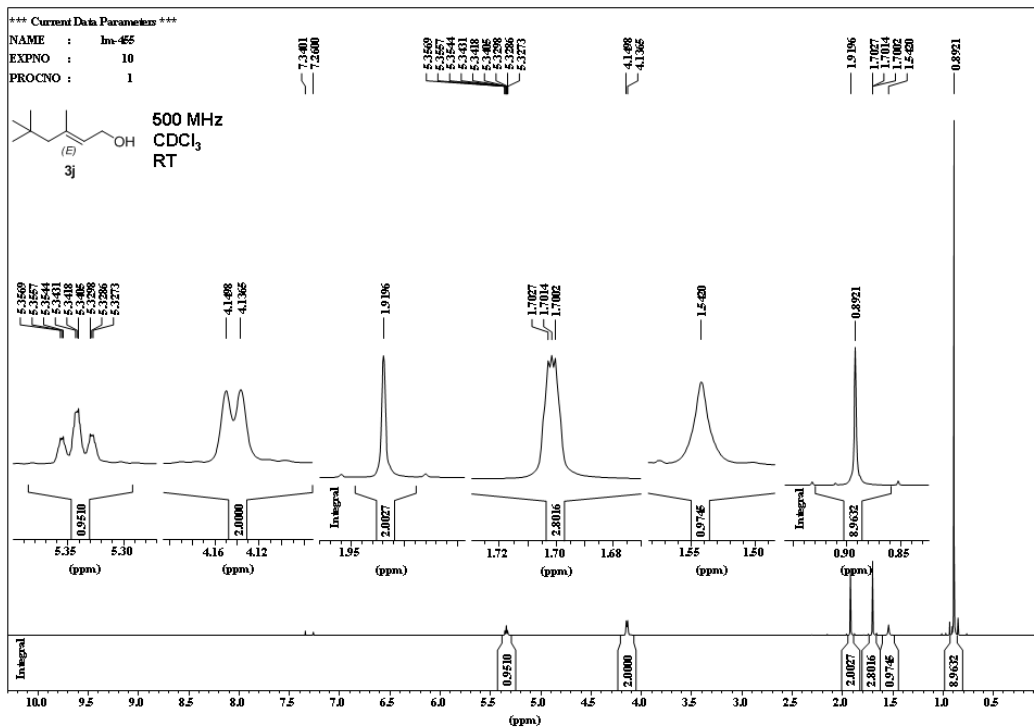

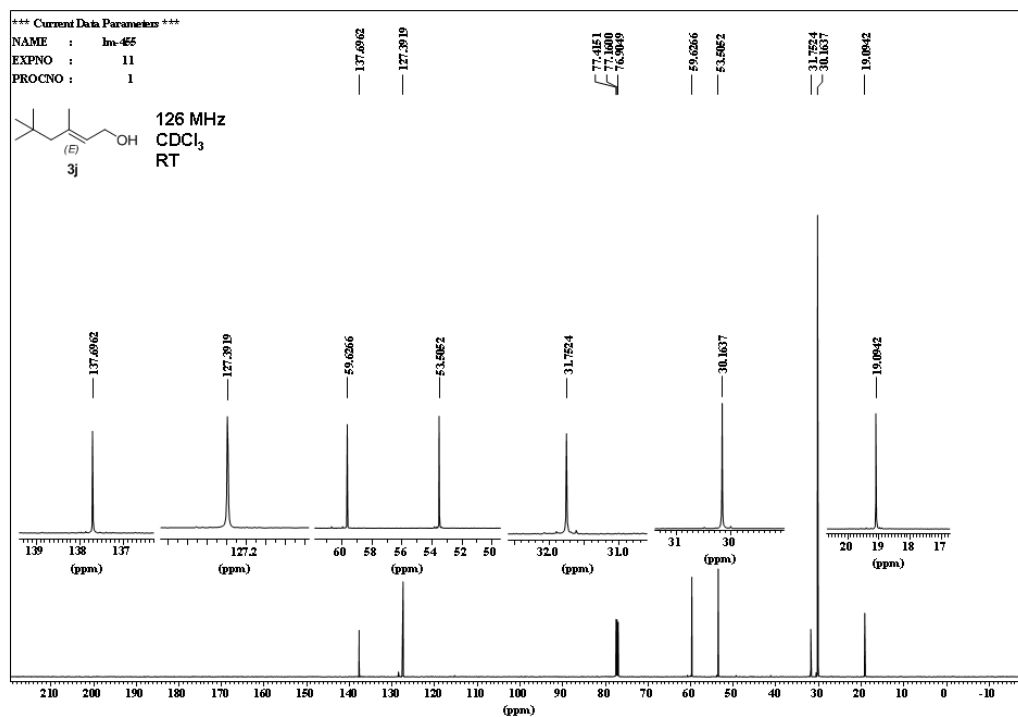

Supplement: b920342g.pdf [file b920342g.pdf]
